1 **The Arabidopsis ARID-HMG protein AtHMGB15 modulates JA signalling by regulating**  
2 **MYC2 during pollen development**

3 **Sonal Sachdev, Ruby Biswas, Adrita Roy and Shubho Chaudhuri\***

4 **Division of Plant Biology, Bose Institute, Unified Academic Campus, EN 80, Sector V,**  
5 **Bidhannagar Kolkata - 700091 WB India.**

6

7 **\* Correspondence: [shubho@icbose.ac.in](mailto:shubho@icbose.ac.in)**

8

9 • Shubho Chaudhuri <https://orcid.org/0000-0003-2247-0030>

10 • Sonal Sachdev <https://orcid.org/0000-0002-6826-8308>

11 • Ruby Biswas <https://orcid.org/0000-0003-2084-1125>

12 • Adrita Roy <https://orcid.org/0000-0001-9471-6971>

13 **Running title:** AtHMGB15 regulates JA signalling during pollen development.

14 **ABSTRACT**

15 **In flowering plants, jasmonic acid (JA) signalling regulates the complex process of male**  
16 **gametophyte development. JA signalling initiates with the activation of MYC2**  
17 **transcription factor, for the expression of several JA responsive genes throughout**  
18 **stamen development and pollen maturation. However, the regulation of JA signalling**  
19 **during different developmental stages of male gametophytes is still less understood. In**  
20 **this study we have characterized T-DNA insertion line of AtHMGB15. Phenotypic**  
21 **characterization of *athmgb15-4* mutant plants showed delayed bolting, shorter siliques**  
22 **and reduced seed set compared to wildtype. Moreover, deletion of AtHMGB15 resulted**  
23 **in defective pollen morphology, delayed pollen germination, abberant pollen tube**  
24 **growth and a higher percentage of non-viable pollen population in *athmgb15-4***  
25 **compared to wildtype. Molecular analysis indicated down-regulation of JA-biosynthesis**  
26 **and JA-signalling genes *viz* MYC2, MYB21 and MYB24 in *athmgb15-4* mutant.**  
27 **Furthermore, jasmonic acid and its derivatives were found almost ten-fold lower in**  
28 ***athmgb15-4* flowers. However, exogenous application of jasmonate could restore pollen**  
29 **morphology and pollen germination, suggesting that impaired JA signalling is**  
30 **responsible for the pollen phenotype in *athmgb15* mutant. AtHMGB15 physically**  
31 **interacts with MYC2 protein to form the transcription activation complex for**  
32 **promoting transcription of genes responsible for JA signalling during stamen and**  
33 **pollen development. Collectively, our findings indicate that AtHMGB15, a plant specific**  
34 **DNA binding protein of the ARID-HMG group, acts as a positive regulator of JA**  
35 **signalling to control the spatiotemporal expression of key regulators responsible for**  
36 **stamen and pollen development.**

- 37 • **Key Words:** ARID-HMG, Pollen development, Jasmonic acid signalling, MYC2,  
38 Jasmonate content

## 39 INTRODUCTION

40

41 The development of male gametophyte in angiosperms is a complex phenomenon that requires  
42 coordination of almost all major plant hormone signalling (Marciniak and Przedniczek, 2019,  
43 Mascarenhas, 1990, Wilson and Zhang, 2009). The spatiotemporal activity of key hormone  
44 signalling factors regulates the pollen maturation, anther dehiscence, release of pollen to the  
45 surface of stigma and pollen tube germination, for successful fertilization. Pollen development  
46 starts in anther with the differentiation of sporogenous cells (pollen mother cell) that undergo  
47 meiosis to form tetrads of haploid microspores. The development of free microspores starts with  
48 two rounds of mitotic divisions and the formation of pollen cell wall through programmed cell  
49 death (PCD) of the tapetum layer (McCormick, 2004, Zhang et al., 2007). Degeneration of  
50 tapetum layer is also important for anther dehiscence and release of the mature pollens. In self-  
51 pollinating plants, the release of mature pollen (anther dehiscence) on the surface of stigma  
52 depends upon the appropriate length of the stamen filament. The anthers in these self-pollinating  
53 plants are positioned at equivalent height or above the stigma papillae for efficient release of  
54 pollen and fertilization. Any defects during pollen maturation, stamen elongation or anther  
55 dehiscence can cause loss of fertility or complete male sterility.

56 Plant hormone jasmonic acid (JA) and its derivatives are indispensable for the development of  
57 stamen and male gametophyte maturation (Huang et al., 2017b). In *Arabidopsis*, JA-biosynthesis  
58 deficient mutants viz. *fad3fad7fad8*, *dad1*, *lox3-lox4*, *aos*, and *opr3* are male sterile due to  
59 arrested stamen development at anthesis (Caldelari et al., 2011, Ishiguro et al., 2001, McConn  
60 and Browse, 1996, Park et al., 2002, Stintzi and Browse, 2000). These mutants have indehiscent  
61 anthers or short filaments that fail to reach stigma surface. Although the pollens from these  
62 mutants develop normally to produce tricellular gametophyte but lost viability during later stages  
63 (Acosta and Przybyl, 2019). Exogenous application of jasmonic acid can restore the male sterile  
64 phenotype of JA-biosynthesis deficient mutants (Park et al., 2002). CORONATINE  
65 INSENSITIVE1 (COI1), a F-box protein is a part of SKP1-CULLIN1-F-box-type (SCF) E3  
66 ubiquitin ligase complex SCF<sup>COI1</sup>, and an important component of JA signalling. COI1 form  
67 complex with transcriptional repressors JAZ in presence of JA-Ile derivative and ubiquitinate for  
68 26S proteasome mediate degradation to release MYC transcription factor for JA responsive gene  
69 expression (Chini et al., 2007, Devoto et al., 2002, Thines et al., 2007, Xie et al., 1998, Zhai et al.,

70 2015). Like JA-biosynthesis deficient mutants, *coil* mutants are also impaired in stamen  
71 maturation and are male sterile however exogenous JA application cannot rescue *coil* fertility  
72 (Feys et al., 1994, Xu et al., 2002).

73 The basic helix–loop–helix (bHLH) transcription factor *MYC2* is the key regulator of JA  
74 response. *MYC2* activates the transcription by binding to G-box motif existing in the promoter  
75 regions of JA responsive genes (Dombrecht et al., 2007, Figueroa and Browse, 2012, Kazan and  
76 Manners, 2013, Pozo et al., 2008). In the absence or low concentration of JA-Ile, *MYC2* activity  
77 was repressed by JAZ protein along with co-repressors TOPLESS (TPL), TPL-related (TPR) and  
78 adaptor protein NINJA (An et al., 2022, Huang et al., 2017a). An increase in JA-Ile  
79 concentration during development or environmental clues promotes the formation of COI-JA-  
80 JAZ co-receptor complex to promote COI-mediated degradation of JAZ through 26S proteasome  
81 to release *MYC2* (Chini et al., 2009). Studies have shown that *MYC2*, *MYC3*, *MYC4* and  
82 *MYC5* function redundantly to regulate stamen development and seed production (Gao et al.,  
83 2016, Qi et al., 2015). While the single and double mutants showed no defect in stamen  
84 development; the triple mutants *myc2myc3myc4*, *myc2myc4myc5*, and *myc3myc4myc5* exhibited  
85 delayed stamen development (Dombrecht et al., 2007, Schweizer et al., 2013). The anthers of  
86 these triple mutants failed to dehisce at the floral stage13 and pollens were unable to germinate  
87 *in vitro*, however, anther dehiscence and pollen maturation occur at the later stage of flower  
88 development. The quadruple mutant in comparison to the triple mutant has more severe defects  
89 in stamen development with short stamen filament, indehiscent anther and nonviable pollens (Qi  
90 et al., 2015).

91 *MYC* coordinates JA signalling through R2R3 types of MYB transcription factors, *MYB21* and  
92 *MYB24* during stamen maturation (Song et al., 2011). *MYB21* and *MYB24* physically interact  
93 with *MYC2* to form the *MYC*-*MYB* complex for transcription activation and interacts with *JAZ*  
94 to attenuate their activity (Yang et al., 2020, Zhang et al., 2021). The phytohormone gibberellin  
95 (GA) has been shown regulate the expression of *MYB21/24* and promotes stamen growth  
96 (Cheng et al., 2009). Studies indicate that *DELLA* impedes JA biosynthesis by inhibiting the  
97 expression of *DADI* and *LOXI*. *DELLA* also interacts with *MYB21/24* in absence of GA and  
98 represses their transcriptional activity (Cheng et al., 2009). GA triggers the ubiquitination of  
99 *DELLA*, and upregulates the expression of JA biosynthesis gene *DADI* and *LOXI* (Huang et al.,  
100 2020). The increased concentration of JA will induce the expression of *MYB21* and *MYB24*

101 (Huang et al., 2020, Vera-Sirera et al., 2016). Thus, GA and JA signalling synergistically  
102 modulate stamen elongation by regulating MYC-MYB signalling (Chini et al., 2016, Song et al.,  
103 2014). *myb21* mutants have short filaments that unable the anthers to reach the pistil's stigma  
104 resulting in complete male sterility (Mandaokar et al., 2006). However, *myb21* pollens are viable.  
105 *myb24* mutants are completely fertile, whereas *myb21myb24* double mutants are completely  
106 impaired stamen and are fully sterile suggesting that MYB21 alone is essential for filament  
107 elongation, while MYB24 promotes pollen viability and anther dehiscence(Huang et al., 2017a,  
108 Mandaokar and Browse, 2009, Mandaokar et al., 2006, Song et al., 2011).

109 AtHMGB15 belongs to a novel plant-specific HMG-box group of nuclear architectural proteins  
110 containing two DNA binding domain, ARID and HMG-box (Štros et al., 2007). Biochemical  
111 analysis shows that ARID-HMG proteins bind to different DNA topological structures preferably  
112 in the AT-rich region (Hansen et al., 2008, Roy et al., 2016). A previous study by Xia et.al  
113 demonstrated that AtHMGB15 plays an important role in pollen tube growth (Xia et al., 2014).  
114 Approximately 10% pollen grains of Ds insertion line of AtHMGB15 (*athmgb15-1*) have  
115 defective morphology. Comparative transcriptome between wildtype and *athmgb15-1* pollen  
116 showed alteration of genes specific for pollen. Further, it was shown that AtHMGB15 interact  
117 with two MIKC\* transcription factors, AGL66 and AGL104. Although *athmgb15* mutant  
118 showed a defect in pollen development, it was not clear how AtHMGB15 contribute to this  
119 developmental process. With this background, we started characterising another mutant allele of  
120 *AtHMGB15* (*athmgb15-4*) where the T-DNA was inserted at the first exon. Our study revealed  
121 that around 30% of pollens from *athmgb15-4* plants are defective in pollen morphology and most  
122 of the mutated pollens are round in shape with a defect in the reticulate pattern of ornamentation.  
123 Transcriptome analysis shows significant repression of JA biosynthesis and signalling in  
124 *athmgb15-4* flowers. Collectively our results indicated that AtHMGB15 regulates pollen  
125 development by regulating key master regulators of JA-signalling, MYC2, MYB21 and MYB24.  
126 This study is the first in-depth analysis to understand the mechanistic role of ARID-HMG protein  
127 in pollen development.

128

## 129 **RESULTS**

### 130 **Isolation and Characterization of *athmgb15-4* mutant lines**

131 The *athmgb15-4* mutant was screened from T-DNA insertion lines of *Arabidopsis* ecotype Col-0  
132 from the GABI-Kat collection (GABI\_351D08). GABI\_351D08 from the GABI collection has  
133 the T-DNA insertion annotated at exon 1 of the gene At1g04880 (Fig 1A, i)). The T-DNA  
134 insertion contains sulfadiazine resistant marker. The homozygous *athmgb15-4* lines were  
135 obtained by self-crossing of heterozygous *athmgb15-4* plants followed by the selection of  
136 progeny showing sulfadiazine resistance. The homozygous lines were screened by PCR (Fig  
137 1A,ii) and the T-DNA insertion was confirmed by Southern blot (Fig S1). q-RT-PCR analysis  
138 showed significant down-regulation of *AtHMGB15* expression in *athmgb15-4* mutant plants (Fig  
139 1A,iii). We have shown previously the absence of *AtHMGB15* protein in the same mutant  
140 (Mallik et al., 2020). The homozygous seeds were collected and used for subsequent studies.  
141 The *athmgb15-4* mutant plants showed no phenotypic difference at the rosette stage (Fig 1B, i)  
142 except the primary root length in *athmgb15-4* appeared shorter compared to wild-type plants  
143 (Fig S2). Furthermore, in the flowering stage, *athmgb15-4* plants showed delayed bolting  
144 compared to wild type (Fig 1B, ii). Almost 45% ( $p \leq 0.05$ ) seedling of wildtype showed bolting  
145 after 40dpg compared to 8% ( $p \leq 0.05$ ) in *athmgb15-4* plants (Fig 1B, iii, iv). The seeds  
146 of *athmgb15-4* mutant plants showed no marked difference when compared with wild type.  
147 These mutant seeds are viable and germinate normally similar to wild type. However, mutant  
148 siliques were shorter in length compared to wild type (Fig 1C, i-ii) and had a lesser number of  
149 fertilized ovules resulting in less seed yield compared to wildtype plants (Fig 1C, iii-iv). Some of  
150 these observed phenotypes of *athmgb15-4* agree with previous observations reported by Xia *et*  
151 *al* using another mutant allele of *AtHMGB15* (Xia et al., 2014).

152

### 153 **AtHMGB15 mutation causes a defect in pollen morphology and delayed pollen germination** 154 **rate**

155 An earlier report has shown that *athmgb15* mutant (*athmgb15-1*) plants have defective pollen  
156 morphology (~10%) (Xia et al., 2014). Scanning electron microscopy (SEM) analysis revealed  
157 that the wild-type pollens are ellipsoidal (Fig 2A) whereas pollens of *athmgb15-4* plants have  
158 mixed shaped (Fig S3). While ellipsoid-shaped pollens were observed in the mutant pollen  
159 population, we have also observed around 25-30% of pollens having a circular shape and  
160 sometimes completely irregular shape (Fig 2B). Additionally, the outermost exine wall of  
161 wildtype pollens has a typical reticulate pattern of ornamentation, which is completely absent in

162 the defective pollens of mutant pollen plants. To further understand the molecular changes  
163 in *athmgb15-4* plants that regulates pollen development, a comparative transcriptome approach  
164 was taken. Arabidopsis flowers (stage 13) were collected from wild-type and *athmgb15-4* plants  
165 and total RNA isolated from three independent sets was pooled and subjected to RNA-  
166 sequencing using the Illumina platform. Analysis of RNA-seq data showed significant down-  
167 regulation of genes involved in cell wall biosynthesis in *athmgb15-4* flowers (Fig 2C and Fig  
168 S4). Some of these cell wall genes includes pectin lyase, cellulose synthase, pectin  
169 methylesterase, extensin which are known to be involved in pollen development.

170 We subsequently examined the pollen germination rate between wildtype and *athmgb15-4*  
171 pollens. The time kinetics of *in vitro* pollen tube germination shows that within 4hrs, more than  
172 50% of pollens ( $p \leq 0.005$ ) were germinated and by 6hrs almost 80% ( $p \leq 0.005$ ) germination was  
173 achieved for wildtype pollens (Fig 2D, i, iii). Interestingly, 40% ( $p \leq 0.005$ ) germination  
174 of *athmgb15-4* pollens was observed after 24hrs in pollen germination media (Fig 2D, ii, iv).  
175 These results indicate that mutation of *AtHMGB15* gene causes a severe defect in pollen  
176 morphology and significant delay in pollen tube germination rate. Note that some of the healthy  
177 pollens of *athmgb15-4* that start germinating from the beginning showed similar pollen tube  
178 length as of wildtype, although the percentage of fully germinating pollens was very low in  
179 mutants. The next obvious question that arises from these observations is whether the *athmgb15-4*  
180 pollens are viable. To answer this question, we isolated the wildtype and *athmgb15-4* pollens  
181 and stained them FDA (fluorescein diacetate) and PI (Propidium Iodide). While FDA is  
182 permeable to the cell membrane and can stain live cells, PI is impermeable and can stain DNA  
183 only when the cell integrity is compromised. Thus, PI-stained cells are considered dead cells.  
184 Comparison of differential staining of pollens with FDA and PI showed that a higher percentage  
185 of non-viable pollens (55%,  $p \leq 0.005$ ) in *athmgb15-4* plants compared to wild-type  
186 (30%,  $p \leq 0.05$ ); thereby, justifying a lower number of germinating pollen population in mutant  
187 plants (Fig 2E).

188

### 189 **Deletion of *AtHMGB15* causes down-regulation of the jasmonic acid pathway during flower** 190 **development**

191 KEGG analysis of RNA-seq data shows enrichment of  $\alpha$ -linolenic acid metabolism pathway,  
192 associated with differential gene expression (Fig. 3A, i).  $\alpha$ -linolenic acid is the precursor of the

193 plant phytohormone, jasmonic acid. Jasmonic acid and its derivatives have been shown to regulate  
194 many developmental processes including stamen development and flowering (Jang et al., 2020,  
195 Wasternack and Hause, 2013). Interestingly, function annotation clustering using DAVID  
196 software (v 6.8) shows enrichment of Jasmonic acid (JA) biosynthesis and signalling with the  
197 data set (Fig 3A, ii). Further, the heatmap analysis constructed using genes involved in JA  
198 biosynthesis and signalling pathway displayed down-regulation of gene expression,  
199 in *athmgb15-4* flowers compared to wild-type (Fig. 3B). The expression of many JA  
200 biosynthesis and signalling genes were further validated using q-RT-PCR. As shown in figure 3C,  
201 the relative fold change for genes from JA biosynthesis and JA signalling were significantly  
202 down-regulated in *athmgb15-4* flowers compared to wild-type; thus, validating our RNA-seq  
203 data.

204 To further establish the role of *AtHMGB15* in JA signalling during pollen development, we then  
205 raised complementation lines in *athmgb15-4* background using full-length *AtHMGB15* gene  
206 under 35S constitutive promoter. Stable homozygous lines were selected (*athmgb15-4-OEA4*)  
207 and the expression of *AtHMGB15* was analysed using qRT-PCR (Fig 4A,iii). These  
208 complementation lines were found to be stable and recovered delayed bolting and small silique  
209 size phenotype of *athmgb15-4* mutant (Fig 4A, i, ii). A comparison of pollen tube germination  
210 rate between the complementation line and *athmgb15-4* showed a significantly higher population  
211 of germinated pollens in the complementation line compared to *athmgb15-4* (Fig 4B). The  
212 complementation line has more than 95% ( $p \leq 0.05$ ) of pollen in ellipsoidal shape indicating that  
213 the pollen morphology is completely recovered in these lines (Fig 4C). qRT-PCR results  
214 revealed higher expression of JA biosynthesis and signalling genes in the complementation line  
215 compared to the mutant (Fig 4D). The expression of JA biosynthesis genes in the  
216 complementation line was comparable to wild type however the expression of JA signalling  
217 genes was higher than wild type. Molecular and phenotypic analysis of complementation lines  
218 strongly indicates the role of *AtHMGB15* in JA mediated signalling events during pollen  
219 development.

220

### 221 ***athmgb15* flowers show low levels of jasmonic acid and its derivatives**

222 The down-regulation of JA biosynthesis genes in *athmgb15-4* mutants suggests a low intrinsic  
223 level of jasmonic acid and its derivatives. To check the hormone level, we next estimated the *in*



224 *vivo* level of jasmonate in the flowers of wild-type, *athmgb15-4* and the complementation  
225 line *athmgb15-4-OEA4*. As shown in figure 5A, the levels of JA along with two of its derivatives  
226 methyl-jasmonate (MeJA) and JA-isoleucine (JA-Ile) are almost ten-fold ( $p \leq 0.05$ ) lower  
227 in *athmgb15* flowers compared to wild type. Furthermore, in the complementation line, the level  
228 of JA and its derivatives increased compared to *athmgb15-4*.

229 Since *athmgb15-4* flowers have low jasmonic acid, we studied the effect of exogenous JA  
230 application on *athmgb15-4* flowers by examining the pollen tube germination post 48hrs  
231 treatment. The result shows that exogenous treatment of methyl-jasmonate restores the pollen  
232 tube germination of *athmgb15-4* pollens, and the rate is equivalent to that of wild-type pollens  
233 (Fig 5B).

234

### 235 **AtHMGB15 acts as a transcription activator for the expression of MYC2**

236 The transcriptome data and q-RT-PCR results indicate down-regulation of the key transcription  
237 factors of JA-signalling *viz* *MYC2*, *MYB21* and *MYB24*, in *athmgb15-4* mutant flowers. This  
238 observation prompted us to check whether AtHMGB15 acts as a transcription activator for the  
239 expression of these genes.

#### 240 AtHMGB15 occupancy at the upstream region of MYC2, MYB21 and MYB24

241 We performed ChIP assay using AtHMGB15 antibody and the immunoprecipitated DNA was  
242 subjected to q-PCR. The data were normalized with two loci, At1g01840 and At1g01310,  
243 showing no AtHMGB15 occupancy from our previous study (Mallik et al., 2020). The primers  
244 were designed from *in silico* analysis of ~2Kb promoter/upstream fragments that contain  
245 previously identified AtHMGB15 binding site A(A/C)--ATA---(A/T)(A/T) (Mallik et al., 2020).  
246 The q-PCR analysis showed AtHMGB15 occupancy at the promoter/upstream region of *MYC2*,  
247 *MYB21* as well as *MYB24* (Fig 6A). To test whether AtHMGB15 directly binds to the  
248 promoter/upstream region of *MYC2*, *MYB21* and *MYB24*, we performed *in vitro* DNA binding  
249 using purified recombinant AtHMGB15 protein. The EMSA results confirmed the direct binding  
250 of AtHMGB15 protein at the promoter regions of *MYC2*, *MYB21* and *MYB24* (Fig 6B).

#### 251 AtHMGB15 activates the transcription of MYC2

252 The binding of AtHMGB15 at the promoter/upstream region of *MYC2* prompts us to investigate  
253 whether AtHMGB15 regulates the transcription of *MYC2*. For this, ~2Kb promoter/upstream  
254 region of *MYC2* was cloned against GUS reporter gene in pCambia1304 replacing 35S promoter.

255 These constructs were infiltrated into tobacco plants to examine the promoter activity in the  
256 absence and presence of AtHMGB15. AtHMGB15 is not a transcription factor but it can  
257 modulate transcription when associated with a transcription factor. Previous studies have  
258 identified the MYC2 binding site at the promoter of *MYC2* (Zander et al., 2020). Thus, we  
259 presumed that probably, AtHMGB15 can act as the co-activator of the transcription factor  
260 MYC2. To prove this hypothesis, we measured the promoter activity of *MYC2* in presence of  
261 both the proteins, MYC2 and AtHMGB15. As shown in figure 6C, the promoter activity  
262 of *MYC2* increases in presence of AtHMGB15 (pMYC2 +A4) as compared to only promoter  
263 (pMYC2). The increase was more with MYC2 (pMYC2+MYC2); supporting the earlier finding  
264 that MYC2 regulates its own transcription. Furthermore, in presence of both MYC2 and  
265 AtHMGB15, the promoter activity of pMYC2 was significantly higher to pMYC2. The result  
266 suggests that AtHMGB15 along with MYC2 TF positively activates the transcription of *MYC2*.

#### 267 *AtHMGB15 interacts with MYC2 protein to form the activator complex*

268 Since AtHMGB15 along with MYC2 activates the transcription of pMYC2, we were interested  
269 to see whether they physically interact *in vivo* to form the activator  
270 complex. *AtHMGB15* and *MYC2* coding sequences were cloned in pSITE-cYFP-N1 and pSITE-  
271 nYFP-C1 respectively and used for BiFC using Agrobacterium mediated co-infiltration in onion  
272 epidermis. As shown in Fig 6D, AtHMGB15 interacts with MYC2 protein in the nucleus,  
273 particularly in the nucleolus. There was no YFP fluorescence observed in control combinations.

274

#### 275 **AtHMGB15 promotes the transcription of MYBs**

276 MYC2 has been shown to interact with R2R3-MYB transcription factors, MYB21 and MYB24  
277 to regulate anther and pollen development in a JA dependent manner (Goossens et al., 2017) .  
278 Our results confirm that the expression of *MYB21* and *MYB24* is down-regulated  
279 in *athmgb15* mutants. Also, the *in-silico* analysis shows the presence of MYC2 binding sites at  
280 the promoter region of *MYB24*.

281 Since AtHMGB15 and MYC2 proteins act as transcription activator complex, it was interesting  
282 to study whether this complex regulates the transcription of R2R3-MYBs transcription factors.  
283 To test this possibility, we first checked the expression of MYB21, MYB24 in the flowers of two  
284 previously characterised *myc2* knockout lines *myc2-2* and *jin1-2* (Boter et al., 2004, Lorenzo et  
285 al., 2004). The results show that expression of *MYB21* and *MYB24* were significantly

286 downregulated in *myc2* mutant lines (Fig7A, i). The expression of JA biosynthesis  
287 gene *OPR3*, which was previously shown to be MYC2 dependent (Mandaokar et al., 2006),  
288 was found downregulated in these mutants. Subsequently, we have analysed JA content of *myc2*  
289 mutant and found significant down-regulation of jasmonate contents in these two mutants (Fig  
290 7A, ii). Interestingly, previous study has shown down-regulation of *MYB21* and *MYB24*  
291 expression in *opr3* mutant and it can be restored by the application of exogenous JA (Mandaokar  
292 et al., 2006).

293 We next analysed the promoter activity of *MYB21* and *MYB24* in presence of AtHMGB15 and  
294 MYC2 transcription factor. The promoter activity of pMYB24 was significantly upregulated in  
295 presence of AtHMGB15 and MYC2 independently, however, in presence of both proteins, there  
296 was no additional increase in promoter activity (Fig 7B, i). For pMYB21, an increase in  
297 promoter activity was observed only in the presence of MYC2 protein (Fig 7B, ii.). There was no  
298 increase in the promoter activity in presence of AtHMGB15, although strong DNA binding  
299 activity of AtHMGB15 was observed in the promoter region. Interestingly, the activity of  
300 pMYB21 increase significantly in presence of AtHMGB15 and MYC2, suggesting that these two  
301 proteins form the activation complex for activating pMYB21.

302 Since R2R3 transcription factors were needed for the elongation of stamen during flower  
303 development, we further analysed the flower morphology of *athmgb15-4* and compared it to  
304 wildtype Arabidopsis flower. Our observation suggests that around 30% of *athmgb15-4* flowers  
305 have shorter stamen filaments compared to wild-type (Fig 7C, S5). This may be one of the  
306 reasons for poor fertilization and low seed yield in *athmgb15* mutants. The complementation  
307 lines on the other hand showed a similar stamen phenotype as compared to wildtype.  
308 Collectively, these results indicate that AtHMGB15 regulates the transcription of R2R3-MYB  
309 transcription factors during flower development to regulate the growth and development of  
310 stamen and pollens.

311

## 312 **DISCUSSION**

313

### 314 **Deletion of AtHMGB15 impairs pollen morphology in *Arabidopsis***

315 The development of functional gametes and their respective floral organs is necessary for  
316 maximum pollination and genetic diversity. These complex processes are precisely regulated by

317 endogenous cues. In this study, we have investigated the role of Arabidopsis ARID/HMG group  
318 of transcriptional regulators, AtHMGB15, in pollen development. Previous study by  
319 Xia *et.al.* using a Ds insertion line (Xia et al., 2014) and our study using another T-DNA mutant  
320 allele of AtHMGB15 showed defective pollen morphology and retarded pollen growth in mutant  
321 plants. These allelic mutants of *athmgb15* have a significant reduction in seed set. Since deletion  
322 of functional AtHMGB15 causes defective pollen morphology and pollen viability, we thought  
323 of investigating its role in pollen formation and maturation stages of floral development  
324 in *Arabidopsis*. Pollen development starts post meiosis of sporogenous cells that corresponds to  
325 stage 10 of floral development and continues through stage 12-13 till the completion of the  
326 pollen cell wall (Sanders et al., 1999). This is followed by elongation of filament and anther  
327 dehiscence to release viable pollens for germination (Goldberg et al., 1993, Scott et al., 2004).  
328 With this idea, we first investigated differential gene expression between wildtype  
329 and *athmgb15* mutant during the early stages of flower development, to identify AtHMGB15  
330 regulated targets involved in the pollen development process. Our results indicated that some of  
331 genes responsible for pollen cell wall development were down-regulated in *athmgb15* mutant.  
332 Down-regulation of cell wall genes may explain the defective morphology and deformed cell  
333 wall architecture of *athmgb15* pollens.

334 Transcriptome analysis of wildtype and *athmgb15* revealed that jasmonic acid biosynthesis and  
335 response pathway are significantly downregulated in the mutant flowers. Downregulation of JA  
336 biosynthesis genes causes a significant decrease in jasmonate level in *athmgb15* mutant.  
337 Furthermore, the complementation of *athmgb15-4* with full-length AtHMGB15 or exogenous  
338 application of jasmonate completely restores impaired JA signalling and pollen morphology  
339 of *athmgb15-4*. AtHMGB15 mediated regulation of JA signalling explains the defective pollen  
340 development in *athmgb15* mutants, as the role of jasmonate in stamen and pollen development  
341 has been shown previously (Huang et al., 2017b).

342

### 343 **AtHMGB15 regulates jasmonic acid biosynthesis and signalling during pollen development**

344 Previous studies have established the phytohormone jasmonic acid as one of the major plant  
345 hormones required for different stages of flower development, including regulation of anther  
346 development, stamen elongation, dehiscence, flower opening and pollen development (Huang et  
347 al., 2017a, Huang et al., 2020, Huang et al., 2017b, Ishiguro et al., 2001, Mandaokar and Browse,

348 2009, Mandaokar et al., 2006, McConn and Browse, 1996, Qi et al., 2015). Mutants deficient in  
349 jasmonic acid biosynthesis and signalling were found to have reduced fertility or are male sterile  
350 (Cheng et al., 2009, Feys et al., 1994, Ishiguro et al., 2001, Park et al., 2002, Xie et al., 1998). JA  
351 signal should be attenuated at an appropriate period with appropriate amplitude during the  
352 development process for proper growth and fitness of the plant. This is achieved by a remarkable  
353 regulation between JA biosynthesis and JA signalling through positive and negative feedback  
354 loops (Wasternack, 2019, Wasternack and Hause, 2013, Zander et al., 2020). While positive  
355 feedback increases the jasmonate biosynthesis to activate jasmonate signalling; the negative  
356 feedback regulates the activity of TF like MYC2, by activating the expression of negative  
357 repressors like JAZ or JAZ splice variants to attenuate the JA signalling (Chini et al., 2007, Chini  
358 et al., 2016, Pauwels and Goossens, 2011, Song et al., 2011, Song et al., 2014).

359

### 360 **Regulation of MYC2 mediated JA signalling**

361 The basic-helix-loop-helix transcription factor MYC2 is the master regulator of JA-signalling  
362 (Kazan and Manners, 2013). The MYC2-dependent transcription of JA responsive genes is  
363 tightly regulated by the activity of SCF<sup>COI1</sup>-JAZ complex. JAZ1 physically interacts with MYC2  
364 and inhibits its transcriptional activity (Acosta and Przybyl, 2019, Chini et al., 2007, Xu et al.,  
365 2002). Jasmonate induces SCF<sup>COI1</sup>-dependent proteasomal degradation of JAZ and releases  
366 MYC2 for transcriptional activation (Devoto et al., 2002, Kazan and Manners, 2008, Thines et  
367 al., 2007). Interestingly, one of the primary targets of MYC2 is the promoter of *MYC2* itself  
368 along with that of *JAZ* genes during jasmonate response, indicating that MYC2 activates its  
369 transcription as well as its negative regulator, *JAZ* (Dombrecht et al., 2007, Kazan and Manners,  
370 2013, Zander et al., 2020). Thus, JA dependent destruction of MYC2 repressor for activating JA-  
371 responsive, followed by MYC2 dependent activation of *JAZ* repressor, indicates the involvement  
372 of a negative feedback loop in JA signalling (Chini et al., 2007). Our results suggest that  
373 AtHMGB15 directly binds to the promoter region of *MYC2* gene and positively activates the  
374 transcription of *MYC2*. Since the expression of *MYC2* is compromised in AtHMGB15 deletion  
375 lines, expression of most of the *JAZ* genes (*JAZ1,5,6,7,8* and 10) were found to be down-  
376 regulated in *athmgb15* mutant (Fig. S6). Down-regulation of MYC2 and JAZ genes suggest that  
377 fine tuning of JA signalling is severely affected in *athmgb15* mutants.

### 378 **Regulation of JA biosynthesis**

379 The expression of JA biosynthesis genes such  
380 as *DAD1*, *AOS*, *AOC1*, *OPR1*, *LOX4* and *JAR1* were significantly down-regulated  
381 in *athmgb15* mutants. Studies have shown that JA biosynthesis is regulated by a positive  
382 feedback loop through SCFCOII-JAZ regulatory module in presence of jasmonate derivative  
383 (Devoto et al., 2002) . The proteasomal degradation of JAZ repressor in presence of JA-Ile  
384 releases MYC2 to bind to JA-responsive elements (G-box) present in the promoters of JA-  
385 biosynthesis genes such as *AOS*, *AOC3*, *OPR3*, *OPRL1*, *LOX3* and *LOX4* to promote the  
386 transcription (Dombrecht et al., 2007, Figueroa and Browse, 2012, Kazan and Manners, 2013,  
387 Pozo et al., 2008). The MYC2 dependent transcription of JA biosynthesis genes was further  
388 supported by a previous comparative RNA-seq study showing down-regulation of JA  
389 biosynthesis genes in *MYC2* mutant *jin1-8* plants (Lorenzo et al., 2004). Additionally, our results  
390 indicate significant down-regulation of JA biosynthesis and signalling genes along with  
391 significant decrease in jasmonate content in *myc2-2*, and *jin1-2* mutants. Since the expression of  
392 *MYC2* is significantly down-regulated in *athmgb15* mutant, we have also observed low  
393 expression of JA biosynthesis genes and significant low level of jasmonate in the deletion line.  
394 Taken together, our results propose that AtHMGB15 positively regulates *MYC2* transcription for  
395 the expression of JA biosynthesis genes during pollen development.

396 *DAD1* is a chloroplastic phospholipase A1 lipase that is involved in the initial step of JA  
397 biosynthesis for the formation of  $\alpha$ -linolenic acid. *dad1* mutants were found to be defective in  
398 anther dehiscence, pollen maturation, and flower bud development (Ishiguro et al., 2001, Peng et  
399 al., 2013). The expression of *DAD1* is regulated by homeotic protein AGAMOUS and Auxin  
400 responsive factors ARF6 and ARF8 (Nagpal et al., 2005, Tabata et al., 2010). Our study shows  
401 no change in the expression of *AGAMOUS* or *ARFs*, however, the expression of *COII* was found  
402 to be repressed in *athmgb15* mutants. Study has shown that wound induced expression  
403 of *DAD1* is lower in JA biosynthesis mutant *aos* and *opr3* and completely abolished  
404 in *coi1* mutant suggesting that *DAD1* expression is regulated by both COI-dependent and  
405 independent mechanisms (Ruduś et al., 2014, Hyun et al., 2008). Considering these findings, we  
406 suggest that transcription of *DAD1* is COII-dependent during the pollen development process.

407 *JAR1*, *CYP94B3* and *ST2A* are jasmonic acid catabolic enzymes required for the formation of  
408 jasmonic acid derivatives JA-Ile, 12-hydroxy-JA-Ile and 12-HSO<sub>4</sub>-JA respectively (Ruan et al.,  
409 2019, Wasternack, 2019). For *JAR1*, jasmonic acid is the substrate for JA-Ile formation;

410 CYP94B3 use JA-Ile for hydroxylation and STA2 uses 12-OH-JA for sulphated derivate  
411 (Wasternack and Hause, 2013). Thus, it appears that the biosynthesis of JA catabolites depends  
412 upon the availability of its substrate. Since the jasmonic acid content of *athmgb15* mutant plants  
413 was found to be lower compared to wild-type, we hypothesized that the synthesis of jasmonate  
414 derivatives will be lower in mutant plants. Therefore, the expression of genes responsible for the  
415 formation of JA-derivatives will be repressed due to positive feedback. Further, Koo *et al* have  
416 demonstrated that the expression of *CYP94B3* is dependent on *COI1*, as the expression is  
417 completely diminished in *coi1* mutant. Therefore, reduced expression  
418 of *CYP94B3* in *athmgb15* mutant may be due to both, down-regulation of *COI1* gene expression  
419 and substrate availability (Koo et al., 2011).

#### 420 **Repression of Jasmonic acid biosynthesis and signalling causes down-regulation of JA-** 421 **responsive transcription factor *MYB21* and *MYB24* in *athmgb15* mutant**

422 The R2R3-MYB transcription factors, *MYB21* and *MYB24*, are considered as the master  
423 regulator of JA signalling during stamen development (Huang et al., 2017a, Huang et al., 2020,  
424 Yang et al., 2020). *MYB21* and *MYB24* expression were found to be down-regulated  
425 in *athmgb15* mutant. Furthermore, we have shown that AtHMGB15 binds to the promoter  
426 of *MYB24* and *MYB21* and activates their transcription. There may be two possible reasons for  
427 the repression of MYBs in *athmgb15* mutant. Firstly, repression of JA biosynthesis  
428 in *athmgb15* causes down-regulation of *MYB21* and *MYB24* expression. This can be supported  
429 by a previous studies showing down-regulation of *MYB21* and *MYB24* expression (5-fold)  
430 in *opr3* mutants (Huang et al., 2020, Song et al., 2011). Also, the expression  
431 of *MYB21* and *MYB24* in *opr3* mutant can be restored by exogenous application of JA,  
432 suggesting that JA deficiency blocks the expression of these transcription factors. Additionally,  
433 Cheng et al have shown that GA-dependent expression of *DAD1* is a prerequisite for the  
434 expression of *MYB21* and *MYB24*, suggesting that GA-induced JA biosynthesis regulates the  
435 expression of *MYB21* and *MYB24*. The second possibility for the repression of MYBs in  
436 AtHMGB15 deletion lines may be due to its role as a transcription activator for the expression  
437 of *MYB21* and *MYB24*. Genetic analysis has indicated that *MYB21* and *MYB24* are  
438 indispensable for stamen growth and development and, *myb21myb24* double mutant is  
439 completely male sterile with short filaments, delayed anther dehiscence and non-viable pollens  
440 (Huang et al., 2020). Interestingly, overexpression of *MYB21* partially restores male sterility

441 in *coil* and completely restores stamen elongation and fertility in *opr3* mutant (Qi et al., 2015).  
442 As mentioned earlier, deletion of MYBs or in JA-biosynthesis mutants, stamen growth was  
443 found to be arrested so that anther fails to reach stigma for pollination. In *athmgb15* flowers, we  
444 have found that 30% of flowers showed short filaments. This may be another possible reason for  
445 having less seed yields in *athmgb15* mutant.

#### 446 **AtHMGB15 interacts with MYC2 to form the activator complex for regulating JA-** 447 **responsive transcription**

448 One of the interesting findings from this study is the physical interaction of AtHMGB15 protein  
449 with MYC2 transcription factor. Our finding indicates that AtHMGB15 together with MYC2  
450 activates the transcription of MYC2. A previous study by Zander *et al* have identified that  
451 MYC2 binds many targets that do not have canonical G-box DNA sequence motifs (Dombrecht  
452 et al., 2007, Figueroa and Browse, 2012, Kazan and Manners, 2013, Pozo et al., 2008, Zander et  
453 al., 2020). These targets have AtHMGB15 binding site as one of the enriched motifs present  
454 suggesting that MYC2 may bind indirectly to many such targets through its partner protein  
455 AtHMGB15. This study gave a clue that MYC2 needs partner protein such as AtHMGB15 for its  
456 activity. Since we have observed direct interaction of MYC2 and AtHMGB15, we believe that  
457 the interaction between these two proteins acts as a transcription activator complex in many  
458 MYC2 dependent gene expressions during JA signalling. We have observed that other than  
459 MYC2, AtHMGB15 also activate the promoters of MYB transcription factor.

460 In this study, we have for the first time, identified the mechanistic role of ARID/HMG group of  
461 nuclear protein in the pollen development process. We have identified the role of AtHMGB15 in  
462 the formation of pollen cell wall by positively regulating the expression of a couple of cell wall  
463 genes. We have also demonstrated how the role of AtHMGB15 in JA signalling by forming an  
464 activator complex with MYC2 transcription factor to activate JA-dependent gene expression  
465 during pollen development (Fig. 7D). To date, very less information is available regarding the  
466 physiological roles of plant ARID/HMGs, especially in gene regulation and chromatin  
467 remodelling. The present study shall be a step forward in this direction and has established a new  
468 role of AtHMGB15 in transcription activation other than being an HMG-box group of nuclear  
469 architectural protein.

470

#### 471 **MATERIALS AND METHODS**



## 472 **Plant materials and growth conditions**

473 *Arabidopsis thaliana* ecotype Columbia-O (Col) was used in this study. All the mutants and over-  
474 expression lines used in this study were in the Col background. The T-DNA insertion line of  
475 *AtHMGB15* (GABI\_351D08) was obtained from Eurasian *Arabidopsis* Stock Centre (NASC).  
476 Seeds of *MYC2* mutants (*myc2-2* and *jin1-2*). The seeds were grown on Murashige and Skoog  
477 Agar plates at 22 °C under 16 h:8h light ( $\sim 150 \pm 10 \mu\text{mol m}^{-2} \text{s}^{-1}$ ) and dark cycle in the growth  
478 chamber. 20days old seedlings were transferred to soil pots in greenhouse with 60% relative  
479 humidity. Freshly opened flowers were collected every day between 9:00 am-11:00 am IST  
480 during the flowering stage (flowering stage 13) for downstream experiments. Pictures of  
481 Wildtype, *athmgb15-4* mutant, *athmgb15-4-OEA4* (RE) plants at various growth stages (rosette,  
482 inflorescence bolting, fully mature plant with flower and silique stage) were taken using a digital  
483 camera. Individual organs such as the flowers and siliques were isolated and investigated for  
484 Leica stereo-zoom microscope S9i.

485

## 486 **Generation of Transgenic plants**

487 The coding sequence of *AtHMGB15* was cloned under 35S in pMDC84 using gateway cloning  
488 system (Invitrogen). This construct was used to generate complementation lines constructed in  
489 the Col-0 and in the *athmgb15-4* mutant background. Plant transformation was performed by  
490 *Agrobacterium tumefaciens*-mediated floral dip method and transgenic plants were selected by  
491 hygromycin selection. The complementation lines were confirmed by PCR for insertion of the  
492 DNA fragment and qRT-PCR for expression. The list of primers used for this study is presented  
493 in supplementary table S1.

494

## 495 **RNA extraction, Illumina Sequencing and q-RTPCR**

496 Total RNA was isolated from 200mg of young flowers (flowering stage 12-13) of wildtype and  
497 *athmgb15-4* mutant using RNASure® Mini Kit (Nucleopore-Genetix). RNA isolated from three  
498 such replicates were pooled and used for illumine sequencing using 2 x 75 bp chemistry  
499 generating 30 million paired-end reads per sample. Processing of raw read, adaptor removing  
500 using Trimmomatic v0.35 and mapping of read to *Arabidopsis* genome (TAIR10) using TopHat  
501 v2.1.1 were performed as mentioned earlier. The differential gene expression analysis was  
502 carried out using Cufflink v1.3.0 where threshold fold Change was set (FC) values greater than

503 zero along with P value threshold of 0.05 where threshold fold Change was set (FC) values  
504 greater than  $\pm 1$  with P value cut-off filter of 0.05 were considered as differentially expressed  
505 genes. For qRT-PCR was performed as described earlier. The relative fold change for the gene of  
506 interest was calculated with respect to housekeeping gene *AtEF1a* transcript (At1g07920) level  
507 using  $2^{-\Delta\Delta CT}$  method. The significance of the results was analysed by paired two-tailed Student's  
508 t-test ( $P \leq 0.05$ ) using at least three independent biological replicates. The primers used in the  
509 analysis are enlisted in Supplementary Table S1.

510

### 511 **Bioinformatic analysis:**

512 The functional annotation clustering and KEGG pathway were generated for the significant  
513 DEGs and were analysed using DAVID v6.8. The heatmaps were generated using MeV (v4.9.0).  
514 The promoter sequence of *MYC2*, *MYB24*, *MYB21* was analysed using PlantPAN 3.0.

515

### 516 **Chromatin immunoprecipitation and ChIP-qPCR**

517 Nuclei from the 700mg of wildtype flower tissue were isolated using the Plant Nuclei isolation  
518 kit (Sigma, # CELLYTPN 1) conferring to the manufacturer's protocol. The chromatin  
519 immunoprecipitation assay was performed as described previously by (Mallik et al., 2020). and  
520 immunoprecipitated DNA was analysed by ChIP-qPCR. The data were normalized with respect  
521 to input and fold change was calculated against previously characterised two loci At1g01840 and  
522 At1g01310 using  $2^{-\Delta\Delta CT}$  method. Three independent biological replicate samples were used for  
523 qPCR experiments, where each sample was collected from  $\geq 80$  wildtype plants in the flowering  
524 stage. The significance of the results was analysed by paired two-tailed Student's t-test  $P \leq 0.05$ .  
525 The primer list for the ChIP study is attached in the supplementary table S1.

526

### 527 **DNA Binding Assay**

528 Electrophoretic mobility shift assay EMSA was performed using the protocol described  
529 previously (Roy et al., 2016). DNA fragments (200bp) w from the promoter/upstream region of  
530 *MYC2*, *MYB21* and *MYB24* containing previously identified AtHMGB15 binding site "A(A/C)–  
531 ATA—(A/T)(A/T)" was PCR amplified and end-labelled with  $\gamma\text{-}^{32}\text{P}\text{-ATP}$ .  $5 \times 10^4$ cpm  $\gamma\text{P}32$   
532 labelled DNA ( $\sim 7$  fmol) was mixed with increasing concentrations of AtHMGB15 from  $0.5\mu\text{M}$   
533 to  $3\mu\text{M}$  and the DNA-protein mixture was analysed by 5% native PAGE in 0.5X TBE at  $4^\circ\text{C}$ .

534

### 535 **Scanning Electron Microscopy**

536 Pollen grains were isolated from anthers of dried flowers of wildtype, *athmgb15-4* mutant and  
537 *athmgb15-4-OEA4 (RE)* and refined by passing them through a series of fine mesh with  
538 decreasing porosity. The pollen grains were brushed onto the brass stub with a carbon tape and  
539 subjected to gold coating in Edward gold sputter coater. The coated samples were visualised in  
540 SEM (FEI 200) under an accelerating voltage of 5, 10 and 20 kV.

541

### 542 **Pollen germination and viability assay**

543 Pollen germination assay was done as described previously (Li, 2011). Pollen was isolated from  
544 mature wildtype and *athmgb15-4* flowers by drying them and then suspending them in a pollen  
545 germination medium containing 20% (w/v) Sucrose, 100mM boric acid, 1M CaCl<sup>2</sup>, 200mM Tris  
546 MES, 1M MgSO<sub>4</sub>, 30% PEG 4000 and 500mM KCl of pH 5.6-6 (Fan et al., 2001). Pollen  
547 germination was observed after 2hr, 4hr, 6hr and 24hrs and visualized by microscope (Nikon  
548 ECLIPSE Ni). Double staining with fluorescein diacetate and propidium iodide was performed  
549 using the method of Chang et al. (2014). A drop containing the stained pollens were viewed  
550 under a fluorescence microscope (Nikon ECLIPSE Ni) at 537nm and 480nm wavelengths for PI  
551 and FDA respectively.

552

### 553 **Hormone Estimation**

554 Jasmonic acid content was estimated using Electron Spray Ionisation coupled with Mass  
555 Spectroscopy (ESI-MS) as described previously (Liu et al., 2010). 500mg of fresh flower tissue  
556 from wildtype, *athmgb15-4* and *athmgb15-4-OEA4 (RE)* plants were homogenised in liquid N<sub>2</sub>  
557 and extracted overnight with Methanol (HPLC grade) at 4°C. The homogenates were centrifuged  
558 and diluted with water (HPLC grade) and subjected to the Sep-pak C18 cartridge (SPE). SPE  
559 cartridge was washed with 20% and 30% methanol and finally eluted with 100% methanol. The  
560 eluant was 10 times diluted with methanol and analysed by ESI-MS. Analytical standards of  
561 Methyl Jasmonate (Sigma® #392707), Jasmonic Acid (Sigma® #J2500) and Jasmonic Acid-  
562 Isoleucine (Cayman Chemical® #10740) were used. The relative abundance of all three  
563 derivatives in the wildtype, *athmgb15-4* and *athmgb15-4-OEA4 (RE)* samples was obtained and  
564 expressed as fold change with respect to wildtype.

565 **Plant treatment**

566 For Methyl Jasmonate (MeJA) treatment, the wildtype and *athmgb15-4* plants were grown  
567 directly in soil. At the onset of flowering, 0.5 mM and 2 mM MeJA (Sigma® #392707) was  
568 sprayed directly onto the flower buds twice a day for two consecutive days. The treated flowers  
569 were harvested and used for pollen germination assay (Park et al., 2002).

570

571 **GUS Assay**

572 GUS assay was performed as described previously (Bedi and Nag Chaudhuri, 2018). 2KB  
573 promoter regions of *MYC2*, *MYB21* and *MYB24* were cloned into pKGWFS7 vector, containing  
574 GUS as the reporter gene, by the Gateway cloning (Invitrogen®). Similarly, the full length  
575 coding sequence of *AtHMGB15* and *MYC2* was cloned in pMDC84 and pCambia1304  
576 respectively. Overnight culture of *Agrobacterium tumefaciens* strain EHA105 containing  
577 *pMYC2*, *pMYB21*, *pMYB24* was mixed individually with different combinations of  
578 *Agrobacterium* strain containing 35S::*AtHMGB15* and 35S::*MYC2* at OD<sub>600</sub>0.8 and infiltrated  
579 into the leaves of 6weeks old *Nicotiana tabacum* plants. The leaf samples after 48hrs of  
580 incubation were homogenized and GUS activity was measured using 1 mM MUG at  
581 fluorescence at 455 nm (excitation at 365 nm) in a fluorimeter (Thermo Scientific Varioskan  
582 Flash). The total protein concentration of extracted leaf samples was measured by Bradford  
583 method at 595 nm. GUS activity was represented as nanomoles of 4 -MU produced per mg of  
584 protein and the total data was obtained from 15 sets of biological repeats.

585

586 **BiFC**

587 For BiFC assay, full-length coding sequence of *AtHMGB15* and *MYC2* were cloned through  
588 Gateway cloning system (Invitrogen) into the binary vector pSITE-cEYFP-N1 (CD3-1651) and  
589 pSITE-nEYFP-C1 (CD3-1648) respectively. *Agrobacterium* strain (EHA105) transformed with  
590 the cloned vectors along with the empty vectors as control were infiltrated into onion epidermis  
591 as done previously (Roy et al., 2019). The inner epidermal peels were isolated and subjected to  
592 wash with 1% PBS for 16 h, after which they were mounted on slide and observed for interaction  
593 under the confocal microscope.

594

## 595 **Data Availability**

596 The datasets generated during this current study are available in the NCBI Sequence Read  
597 Archive repository (<https://www.ncbi.nlm.nih.gov/sra/PRJNA874885>) under the Accession ID:  
598 PRJNA874885.

599

## 600 **ACKNOWLEDGEMENTS AND FUNDING**

601 This work was supported by SERB, Department of Science and Technology, Government of  
602 India, (SERB/2017/000768). Sonal Sachdev sincerely acknowledges UGC; Government of India,  
603 for her fellowship [UGC-Ref. No.: 749/ (CSIR-UGC NET DEC. 2016)].

604 The authors sincerely acknowledge Bose Institute for institutional support. The authors sincerely  
605 thanks Dr. Sreeramaiah Gangappa (IISER, Kolkata) for the seeds of SALK\_083483 (*atmyc2-2*)  
606 and SALK\_061267 (*atjin1-2*) and Dr. Anindita Seal (Department of Biotechnology, University  
607 of Calcutta) for BiFC vectors and Ms Ayantika Nandi for her technically support in this project.  
608 Authors would like to acknowledge Bose Institute for providing infrastructure for experiments  
609 and data analysis. Authors declared no conflict of interest.

610

## 611 **AUTHORS CONTRIBUTION**

612 SC conceptualized the idea and supervised the project. SS performed experiments related to  
613 raising transgenic and morphological studies, q-RTPCR, pollen germination, EMSA, BiFC,  
614 SEM, hormone estimation and analyzed RNA seq data. RB performed experiments pollen  
615 viability, pollen germination, promoter assay, flower morphology, analyzed RNA seq data and  
616 assisted SS in EMSA, SEM and AR screened *athmgb15-4* mutant line, standardization of pollen  
617 SEM and prepared samples for RNA seq. SC wrote the original draft and all the authors read,  
618 edited and reviewed, Funding Acquisition, S.C

619

## 620 **REFERENCE**

- 621 ACOSTA, I. F. & PRZYBYL, M. 2019. Jasmonate signaling during Arabidopsis stamen  
622 maturation. *Plant and Cell Physiology*, 60, 2648-2659.  
623 AN, C., DENG, L., ZHAI, H., YOU, Y., WU, F., ZHAI, Q., GOOSSENS, A. & LI, C. 2022.  
624 Regulation of jasmonate signaling by reversible acetylation of TOPLESS in Arabidopsis.  
625 *Molecular Plant*, 15, 1329-1346.  
626 BEDI, S. & NAG CHAUDHURI, R. 2018. Transcription factor ABI 3 auto-activates its own  
627 expression during dehydration stress response. *FEBS letters*, 592, 2594-2611.

- 628 BOTER, M., RUÍZ-RIVERO, O., ABDEEN, A. & PRAT, S. 2004. Conserved MYC  
629 transcription factors play a key role in jasmonate signaling both in tomato and  
630 Arabidopsis. *Genes & development*, 18, 1577-1591.
- 631 CALDELARI, D., WANG, G., FARMER, E. E. & DONG, X. 2011. Arabidopsis *lox3 lox4*  
632 double mutants are male sterile and defective in global proliferative arrest. *Plant*  
633 *molecular biology*, 75, 25-33.
- 634 CHENG, H., SONG, S., XIAO, L., SOO, H. M., CHENG, Z., XIE, D. & PENG, J. 2009.  
635 Gibberellin acts through jasmonate to control the expression of MYB21, MYB24, and  
636 MYB57 to promote stamen filament growth in Arabidopsis. *PLoS genetics*, 5, e1000440.
- 637 CHINI, A., BOTER, M. & SOLANO, R. 2009. Plant oxylipins: COI1/JAZs/MYC2 as the core  
638 jasmonic acid-signalling module. *The FEBS journal*, 276, 4682-4692.
- 639 CHINI, A., FONSECA, S., FERNANDEZ, G., ADIE, B., CHICO, J., LORENZO, O., GARCÍA-  
640 CASADO, G., LÓPEZ-VIDRIERO, I., LOZANO, F. & PONCE, M. 2007. The JAZ  
641 family of repressors is the missing link in jasmonate signalling. *Nature*, 448, 666-671.
- 642 CHINI, A., GIMENEZ-IBANEZ, S., GOOSSENS, A. & SOLANO, R. 2016. Redundancy and  
643 specificity in jasmonate signalling. *Current opinion in plant biology*, 33, 147-156.
- 644 DEVOTO, A., NIETO-ROSTRO, M., XIE, D., ELLIS, C., HARMSTON, R., PATRICK, E.,  
645 DAVIS, J., SHERRATT, L., COLEMAN, M. & TURNER, J. G. 2002. COI1 links  
646 jasmonate signalling and fertility to the SCF ubiquitin–ligase complex in Arabidopsis.  
647 *The Plant Journal*, 32, 457-466.
- 648 DOMBRECHT, B., XUE, G. P., SPRAGUE, S. J., KIRKEGAARD, J. A., ROSS, J. J., REID, J.  
649 B., FITT, G. P., SEWELAM, N., SCHENK, P. M., MANNERS, J. M. & KAZAN, K.  
650 2007. MYC2 Differentially Modulates Diverse Jasmonate-Dependent Functions in  
651 Arabidopsis. *The Plant Cell*, 19, 2225-2245.
- 652 FEYS, B. J., BENEDETTI, C. E., PENFOLD, C. N. & TURNER, J. G. 1994. Arabidopsis  
653 mutants selected for resistance to the phytotoxin coronatine are male sterile, insensitive to  
654 methyl jasmonate, and resistant to a bacterial pathogen. *The Plant Cell*, 6, 751-759.
- 655 FIGUEROA, P. & BROWSE, J. 2012. The Arabidopsis JAZ2 promoter contains a G-Box and  
656 thymidine-rich module that are necessary and sufficient for jasmonate-dependent  
657 activation by MYC transcription factors and repression by JAZ proteins. *Plant and Cell*  
658 *Physiology*, 53, 330-343.
- 659 GAO, C., QI, S., LIU, K., LI, D., JIN, C., LI, Z., HUANG, G., HAI, J., ZHANG, M. & CHEN,  
660 M. 2016. MYC2, MYC3, and MYC4 function redundantly in seed storage protein  
661 accumulation in Arabidopsis. *Plant Physiology and Biochemistry*, 108, 63-70.
- 662 GOLDBERG, R. B., BEALS, T. P. & SANDERS, P. M. 1993. Anther development: basic  
663 principles and practical applications. *The Plant Cell*, 5, 1217.
- 664 GOOSSENS, J., MERTENS, J. & GOOSSENS, A. 2017. Role and functioning of bHLH  
665 transcription factors in jasmonate signalling. *Journal of Experimental Botany*, 68, 1333-  
666 1347.
- 667 HANSEN, F. T., MADSEN, C. K., NORDLAND, A. M., GRASSER, M., MERKLE, T. &  
668 GRASSER, K. D. 2008. A novel family of plant DNA-binding proteins containing both  
669 HMG-box and AT-rich interaction domains. *Biochemistry*, 47, 13207-13214.
- 670 HUANG, H., GAO, H., LIU, B., QI, T., TONG, J., XIAO, L., XIE, D. & SONG, S. 2017a.  
671 Arabidopsis MYB24 regulates jasmonate-mediated stamen development. *Frontiers in*  
672 *Plant Science*, 8, 1525.

- 673 HUANG, H., GONG, Y., LIU, B., WU, D., ZHANG, M., XIE, D. & SONG, S. 2020. The  
674 DELLA proteins interact with MYB21 and MYB24 to regulate filament elongation in  
675 Arabidopsis. *BMC plant biology*, 20, 1-9.
- 676 HUANG, H., LIU, B., LIU, L. & SONG, S. 2017b. Jasmonate action in plant growth and  
677 development. *Journal of experimental botany*, 68, 1349-1359.
- 678 HYUN, Y., CHOI, S., HWANG, H.-J., YU, J., NAM, S.-J., KO, J., PARK, J.-Y., SEO, Y. S.,  
679 KIM, E. Y. & RYU, S. B. 2008. Cooperation and functional diversification of two  
680 closely related galactolipase genes for jasmonate biosynthesis. *Developmental cell*, 14,  
681 183-192.
- 682 ISHIGURO, S., KAWAI-ODA, A., UEDA, J., NISHIDA, I. & OKADA, K. 2001. The  
683 DEFECTIVE IN ANther DEHISCENCE1 Gene Encodes a Novel Phospholipase A1  
684 Catalyzing the Initial Step of Jasmonic Acid Biosynthesis, Which Synchronizes Pollen  
685 Maturation, Anther Dehiscence, and Flower Opening in Arabidopsis. *The Plant Cell*, 13,  
686 2191-2209.
- 687 JANG, G., YOON, Y. & CHOI, Y. D. 2020. Crosstalk with jasmonic acid integrates multiple  
688 responses in plant development. *International journal of molecular sciences*, 21, 305.
- 689 KAZAN, K. & MANNERS, J. M. 2008. Jasmonate signaling: toward an integrated view. *Plant*  
690 *physiology*, 146, 1459-1468.
- 691 KAZAN, K. & MANNERS, J. M. 2013. MYC2: the master in action. *Molecular plant*, 6, 686-  
692 703.
- 693 KOO, A. J., COOKE, T. F. & HOWE, G. A. 2011. Cytochrome P450 CYP94B3 mediates  
694 catabolism and inactivation of the plant hormone jasmonoyl-L-isoleucine. *Proceedings of*  
695 *the National Academy of Sciences*, 108, 9298-9303.
- 696 LI, X. 2011. Arabidopsis pollen tube germination. *Bio-protocol*, e73-e73.
- 697 LIU, X., YANG, Y., LIN, W., TONG, J., HUANG, Z. & XIAO, L. 2010. Determination of both  
698 jasmonic acid and methyl jasmonate in plant samples by liquid chromatography tandem  
699 mass spectrometry. *Chinese Science Bulletin*, 55, 2231-2235.
- 700 LORENZO, O., CHICO, J. M., SAÉNCHEZ-SERRANO, J. J. & SOLANO, R. 2004.  
701 JASMONATE-INSENSITIVE1 Encodes a MYC Transcription Factor Essential to  
702 Discriminate between Different Jasmonate-Regulated Defense Responses in  
703 Arabidopsis[W]. *The Plant Cell*, 16, 1938-1950.
- 704 MALLIK, R., PRASAD, P., KUNDU, A., SACHDEV, S., BISWAS, R., DUTTA, A., ROY, A.,  
705 MUKHOPADHYAY, J., BAG, S. K. & CHAUDHURI, S. 2020. Identification of  
706 genome-wide targets and DNA recognition sequence of the Arabidopsis HMG-box  
707 protein AtHMGB15 during cold stress response. *Biochimica et Biophysica Acta (BBA)-*  
708 *Gene Regulatory Mechanisms*, 1863, 194644.
- 709 MANDAOKAR, A. & BROWSE, J. 2009. MYB108 acts together with MYB24 to regulate  
710 jasmonate-mediated stamen maturation in Arabidopsis. *Plant Physiology*, 149, 851-862.
- 711 MANDAOKAR, A., THINES, B., SHIN, B., MARKUS LANGE, B., CHOI, G., KOO, Y. J.,  
712 YOO, Y. J., CHOI, Y. D., CHOI, G. & BROWSE, J. 2006. Transcriptional regulators of  
713 stamen development in Arabidopsis identified by transcriptional profiling. *The Plant*  
714 *Journal*, 46, 984-1008.
- 715 MARCINIAK, K. & PRZEDNICZEK, K. 2019. Comprehensive Insight into Gibberellin- and  
716 Jasmonate-Mediated Stamen Development. *Genes*, 10, 811.
- 717 MASCARENHAS, J. P. 1990. Gene activity during pollen development. *Annual review of plant*  
718 *biology*, 41, 317-338.

- 719 MCCONN, M. & BROWSE, J. 1996. The Critical Requirement for Linolenic Acid Is Pollen  
720 Development, Not Photosynthesis, in an Arabidopsis Mutant. *The Plant Cell*, 8, 403-416.
- 721 MCCORMICK, S. 2004. Control of Male Gametophyte Development. *The Plant Cell*, 16, S142-  
722 S153.
- 723 NAGPAL, P., ELLIS, C. M., WEBER, H., PLOENSE, S. E., BARKAWI, L. S., GUILFOYLE,  
724 T. J., HAGEN, G., ALONSO, J. M., COHEN, J. D. & FARMER, E. E. 2005. Auxin  
725 response factors ARF6 and ARF8 promote jasmonic acid production and flower  
726 maturation.
- 727 PARK, J. H., HALITSCHKE, R., KIM, H. B., BALDWIN, I. T., FELDMANN, K. A. &  
728 FEYEREISEN, R. 2002. A knock-out mutation in allene oxide synthase results in male  
729 sterility and defective wound signal transduction in Arabidopsis due to a block in  
730 jasmonic acid biosynthesis. *The Plant Journal*, 31, 1-12.
- 731 PAUWELS, L. & GOOSSENS, A. 2011. The JAZ proteins: a crucial interface in the jasmonate  
732 signaling cascade. *The Plant Cell*, 23, 3089-3100.
- 733 PENG, Y. J., SHIH, C. F., YANG, J. Y., TAN, C. M., HSU, W. H., HUANG, Y. P., LIAO, P. C.  
734 & YANG, C. H. 2013. A RING-type E3 ligase controls anther dehiscence by activating  
735 the jasmonate biosynthetic pathway gene DEFECTIVE IN ANTHET DEHISCENCE 1 in  
736 Arabidopsis. *The Plant Journal*, 74, 310-327.
- 737 POZO, M. J., VAN DER ENT, S., VAN LOON, L. & PIETERSE, C. M. 2008. Transcription  
738 factor MYC2 is involved in priming for enhanced defense during rhizobacteria-induced  
739 systemic resistance in Arabidopsis thaliana. *New phytologist*, 180, 511-523.
- 740 QI, T., HUANG, H., SONG, S. & XIE, D. 2015. Regulation of Jasmonate-Mediated Stamen  
741 Development and Seed Production by a bHLH-MYB Complex in Arabidopsis. *The Plant*  
742 *Cell*, 27, 1620-1633.
- 743 ROY, A., DUTTA, A., ROY, D., GANGULY, P., GHOSH, R., KAR, R. K., BHUNIA, A.,  
744 MUKHOPADHYAY, J. & CHAUDHURI, S. 2016. Deciphering the role of the AT-rich  
745 interaction domain and the HMG-box domain of ARID-HMG proteins of Arabidopsis  
746 thaliana. *Plant Mol Biol*, 92, 371-88.
- 747 RUAN, J., ZHOU, Y., ZHOU, M., YAN, J., KHURSHID, M., WENG, W., CHENG, J. &  
748 ZHANG, K. 2019. Jasmonic Acid Signaling Pathway in Plants. *International Journal of*  
749 *Molecular Sciences*, 20, 2479.
- 750 RUDUŠ, I., TERAJ, H., SHIMIZU, T., KOJIMA, H., HATTORI, K., NISHIMORI, Y.,  
751 TSUKAGOSHI, H., KAMIYA, Y., SEO, M. & NAKAMURA, K. 2014. Wound-induced  
752 expression of DEFECTIVE IN ANTHET DEHISCENCE1 and DAD1-like lipase genes  
753 is mediated by both CORONATINE INSENSITIVE1-dependent and independent  
754 pathways in Arabidopsis thaliana. *Plant cell reports*, 33, 849-860.
- 755 SANDERS, P. M., BUI, A. Q., WETERINGS, K., MCINTIRE, K., HSU, Y.-C., LEE, P. Y.,  
756 TRUONG, M. T., BEALS, T. & GOLDBERG, R. 1999. Anther developmental defects in  
757 Arabidopsis thaliana male-sterile mutants. *Sexual plant reproduction*, 11, 297-322.
- 758 SCHWEIZER, F., FERNÁNDEZ-CALVO, P., ZANDER, M., DIEZ-DIAZ, M., FONSECA, S.,  
759 GLAUSER, G., LEWSEY, M. G., ECKER, J. R., SOLANO, R. & REYMOND, P. 2013.  
760 Arabidopsis Basic Helix-Loop-Helix Transcription Factors MYC2, MYC3, and MYC4  
761 Regulate Glucosinolate Biosynthesis, Insect Performance, and Feeding Behavior *The*  
762 *Plant Cell*, 25, 3117-3132.
- 763 SCOTT, R. J., SPIELMAN, M. & DICKINSON, H. 2004. Stamen structure and function. *The*  
764 *plant cell*, 16, S46-S60.



- 765 SONG, S., QI, T., HUANG, H., REN, Q., WU, D., CHANG, C., PENG, W., LIU, Y., PENG, J.  
766 & XIE, D. 2011. The jasmonate-ZIM domain proteins interact with the R2R3-MYB  
767 transcription factors MYB21 and MYB24 to affect jasmonate-regulated stamen  
768 development in Arabidopsis. *The Plant Cell*, 23, 1000-1013.
- 769 SONG, S., QI, T., WASTERACK, C. & XIE, D. 2014. Jasmonate signaling and crosstalk with  
770 gibberellin and ethylene. *Current Opinion in Plant Biology*, 21, 112-119.
- 771 STINTZI, A. & BROWSE, J. 2000. The Arabidopsis male-sterile mutant, opr3, lacks the 12-  
772 oxophytodienoic acid reductase required for jasmonate synthesis. *Proceedings of the*  
773 *National Academy of Sciences*, 97, 10625-10630.
- 774 ŠTROS, M., LAUNHOLT, D. & GRASSER, K. D. 2007. The HMG-box: a versatile protein  
775 domain occurring in a wide variety of DNA-binding proteins. *Cellular and Molecular*  
776 *Life Sciences*, 64, 2590.
- 777 TABATA, R., IKEZAKI, M., FUJIBE, T., AIDA, M., TIAN, C.-E., UENO, Y., YAMAMOTO,  
778 K. T., MACHIDA, Y., NAKAMURA, K. & ISHIGURO, S. 2010. Arabidopsis auxin  
779 response factor6 and 8 regulate jasmonic acid biosynthesis and floral organ development  
780 via repression of class 1 KNOX genes. *Plant and Cell Physiology*, 51, 164-175.
- 781 THINES, B., KATSIR, L., MELOTTO, M., NIU, Y., MANDAOKAR, A., LIU, G., NOMURA,  
782 K., HE, S. & HOWE, G. 2007. Browse J. 2007. *JAZ repressor proteins are targets of the*  
783 *SCF (COII) complex during jasmonate signalling. Nature*, 448, 661-665.
- 784 VERA-SIRERA, F., GOMEZ, M. D. & PEREZ-AMADOR, M. A. 2016. DELLA proteins, a  
785 group of GRAS transcription regulators that mediate gibberellin signaling. *Plant*  
786 *transcription factors*. Elsevier.
- 787 WASTERACK, C. 2019. Termination in jasmonate signaling by MYC2 and MTBs. *Trends in*  
788 *plant science*, 24, 667-669.
- 789 WASTERACK, C. & HAUSE, B. 2013. Jasmonates: biosynthesis, perception, signal  
790 transduction and action in plant stress response, growth and development. An update to  
791 the 2007 review in *Annals of Botany. Annals of botany*, 111, 1021-1058.
- 792 WILSON, Z. A. & ZHANG, D.-B. 2009. From Arabidopsis to rice: pathways in pollen  
793 development. *Journal of Experimental Botany*, 60, 1479-1492.
- 794 XIA, C., WANG, Y. J., LIANG, Y., NIU, Q. K., TAN, X. Y., CHU, L. C., CHEN, L. Q.,  
795 ZHANG, X. Q. & YE, D. 2014. The ARID-HMG DNA-binding protein A t HMGB 15 is  
796 required for pollen tube growth in Arabidopsis thaliana. *The Plant Journal*, 79, 741-756.
- 797 XIE, D.-X., FEYS, B. F., JAMES, S., NIETO-ROSTRO, M. & TURNER, J. G. 1998. COI1: an  
798 Arabidopsis gene required for jasmonate-regulated defense and fertility. *Science*, 280,  
799 1091-1094.
- 800 XU, L., LIU, F., LECHNER, E., GENSHIK, P., CROSBY, W. L., MA, H., PENG, W.,  
801 HUANG, D. & XIE, D. 2002. The SCFCOII ubiquitin-ligase complexes are required for  
802 jasmonate response in Arabidopsis. *The Plant Cell*, 14, 1919-1935.
- 803 YANG, Z., LI, Y., GAO, F., JIN, W., LI, S., KIMANI, S., YANG, S., BAO, T., GAO, X. &  
804 WANG, L. 2020. MYB21 interacts with MYC2 to control the expression of terpene  
805 synthase genes in flowers of Freesia hybrida and Arabidopsis thaliana. *Journal of*  
806 *Experimental Botany*, 71, 4140-4158.
- 807 ZANDER, M., LEWSEY, M. G., CLARK, N. M., YIN, L., BARTLETT, A., SALDIERNA  
808 GUZMÁN, J. P., HANN, E., LANGFORD, A. E., JOW, B. & WISE, A. 2020. Integrated  
809 multi-omics framework of the plant response to jasmonic acid. *Nature plants*, 6, 290-302.

- 810 ZHAI, Q., ZHANG, X., WU, F., FENG, H., DENG, L., XU, L., ZHANG, M., WANG, Q. & LI,  
811 C. 2015. Transcriptional mechanism of jasmonate receptor COI1-mediated delay of  
812 flowering time in Arabidopsis. *The Plant Cell*, 27, 2814-2828.
- 813 ZHANG, X., HE, Y., LI, L., LIU, H. & HONG, G. 2021. Involvement of the R2R3-MYB  
814 transcription factor MYB21 and its homologs in regulating flavonol accumulation in  
815 Arabidopsis stamen. *Journal of experimental botany*, 72, 4319-4332.
- 816 ZHANG, Z. B., ZHU, J., GAO, J. F., WANG, C., LI, H., LI, H., ZHANG, H. Q., ZHANG, S.,  
817 WANG, D. M. & WANG, Q. X. 2007. Transcription factor AtMYB103 is required for  
818 anther development by regulating tapetum development, callose dissolution and exine  
819 formation in Arabidopsis. *The Plant Journal*, 52, 528-538.
- 820
- 821

822

## 823 **FIGURE LEGENDS**

824

825 **Figure 1: Phenotypic characterization of *athmgb15-4* mutant.** **A (i)** Schematic showing the  
826 position of T-DNA insertion in the 1st exon of AtHMGB15 (At1g04880) and the position of  
827 PCR primers used for mutant screening. **(ii)** PCR confirmation of *athmgb15* homozygous  
828 line. **(iii)** q-RTPCR showing significant reduction of AtHMGB15 transcript in *athmgb15-4* lines.  
829 Error bars represent mean  $\pm$  SD (n=3). **B (i)** Wild-type and *athmgb15-4* at the rosette stage.  
830 Scale bar=2cm. **(ii & iii)** Delayed flowering of *athmgb15-4* compared to wildtype. Scale  
831 bar=2cm. **(iv)** Quantitative analysis of flower bolting between *athmgb15-4* and wildtype. The  
832 experiments were done from seeds of 4-5 independent harvests. Data were collected from 100  
833 plants of each batch and error bars represent mean  $\pm$  SD (n=400) and significance was calculated  
834 by paired two-tailed student's t-test (\*denotes  $P \leq 0.05$ ). **C (i)** Comparative silique length of  
835 wildtype and *athmgb15-4*. Scale bar=5mm. **(ii)** quantitative silique fresh weight between  
836 *athmgb15-4* and wildtype. Measurement was done using 20 siliques for each observation. Error  
837 bars represent mean  $\pm$  SD (n=6). **(iii)** comparison of seed set between wildtype and *athmgb15-4*.  
838 Scale bar=2.5mm. **(iv)** seed numbers were counted from mature siliques of wildtype  
839 and *athmgb15-4*. Error bar represents mean  $\pm$  SD (n=30). The significance of all these results  
840 was analysed by paired two-tailed student's t-test.

841

842 **Figure 2: *athmgb15-4* have impaired pollen morphology and pollen germination compared**  
843 **to wildtype.** **A.** Scanning electron microscopy (SEM) of pollens isolate from wildtype showing  
844 ellipsoidal shape with reticulate ornamentations. **B.** Representation of defective pollen  
845 morphology of *athmgb15-4* mutant having a circular shape with irregular ornamentation. The  
846 experiment was repeated at least 10 times with pollens isolated from different batches of  
847 wildtype and *athmgb15-4*. **C.** Expression of cell wall biosynthesis genes between wildtype  
848 and *athmgb15-4* using q-RTPCR. The fold change was represented with respect to wildtype.  
849 Error bars represent mean  $\pm$  SD (n=3) and significance ( $p \leq 0.0005$ ) was analysed by paired two-  
850 tailed student's t-test. **D.** Freshly isolated pollens from **(i)** wildtype and **(ii)** *athmgb15-4* were  
851 subjected to *in vitro* germination for different time periods. **(iii) & (iv)** Graphical representation  
852 of rate of pollen germination of wildtype and *athmgb15-4* respectively. Error bars represent

853 mean  $\pm$  SD (n=5) and the significance of the result was analysed by one-way ANOVA  
854 ( $p \leq 0.005$ ). **E.** Pollen viability was measured using fluorescein diacetate and propidium iodide.  
855 Box plot representation of pollen viability between wildtype and *athmgb15-4*. Error bars  
856 represent mean  $\pm$  SD (n=12). The significance of all these results was analysed by paired two-  
857 tailed student's t-test.

858

859 **Figure 3: AtHMGB15 deletion affects jasmonic acid pathway.** Comparative transcriptome  
860 between wildtype and *athmgb15* flowers were performed to identify the candidate genes  
861 involved in pollen development. **A (i)** KEGG analysis for significant DEGs using DAVID v 6.8  
862 **(ii)** Functional annotation clustering showing enrichment of jasmonic acid pathway. **B.** Heatmap  
863 generated with log<sub>10</sub>(FPKM) of genes involved in JA biosynthesis and signalling. **C.** Expression  
864 of differentially regulated JA biosynthesis and signalling genes was analysed between wildtype  
865 and *athmgb15-4* using q-RTPCR. The fold change was represented with respect to wildtype.  
866 Error bars represent mean  $\pm$  SD (n=3). The significance of all these results was analysed by  
867 paired two-tailed Student's t-test. \* Denotes  $p \leq 0.05$ , \*\* $p \leq 0.005$ , \*\*\* $p \leq 0.0005$  and \*\*\*\*  
868  $p \leq 0.00005$ .

869

870 **Figure 4: Complementation of *athmgb15-4* mutant line with AtHMGB15 restores pollen**  
871 **morphology and pollen tube germination.** **A (i)** comparative flower bolting between  
872 wildtype, *athmgb15-4* and *athmgb15-4-OEA4* (RE). Scale bar=2cm. **(ii)** silique length of  
873 wildtype, *athmgb15-4* and RE. Scale bar=4mm. **(iii)** qRT-PCR to check AtHMGB15 transcript  
874 level in wildtype, *athmgb15-4* and RE. The fold change was represented with respect to  
875 wildtype. Error bars represent mean  $\pm$  SD (n=3) and statistical significance ( $p \leq 0.05$ ) was  
876 analysed by paired two-tailed student's t-test. **a** denotes a significant difference between wildtype  
877 vs *athmgb15-4*, **b** denotes between wildtype vs RE, **c** denotes between *athmgb15-4* vs RE. **B. (i-**  
878 **iii)** comparative *in vitro* pollen germination between wildtype, *athmgb15-4* and  
879 RE **(iv)** quantification of the rate of pollen germination. Error bars represent mean  $\pm$  SD (n=3).  
880 Statistical significance ( $p \leq 0.05$ ) was analysed by two-way ANOVA with Fisher's LSD test,  
881 **a** denotes a significant difference between wildtype vs *athmgb15-4*, **b** denotes between wildtype  
882 vs RE, **c** denotes between *athmgb15-4* vs RE and **d** denotes the significance of the three samples  
883 within the time point. **C.** SEM analysis of pollen morphology. **D** expression of JA biosynthesis

884 and signalling genes in wildtype, *athmgb15-4* and RE flowers. The fold change was represented  
885 with respect to wildtype. Error bars represent mean  $\pm$  SD (n=3) and significance ( $p \leq 0.05$ ) was  
886 analysed by paired two-tailed student's t-test. **a** denotes a significant difference between  
887 wildtype vs *athmgb15-4*, **b** denotes between wildtype vs RE, **c** denotes between *athmgb15-4* vs  
888 RE.

889

890 **Figure 5: *athmgb15-4* mutants have reduced levels of JA and its derivatives.** **A.** JA and its  
891 derivatives were measured from the flowers of wildtype, *athmgb15-4* and RE and represented as  
892 fold change with respect to wildtype. Error bars represent mean  $\pm$  SD (n=3) with significance  
893 ( $p \leq 0.05$ ) was analysed by paired two-tailed student's t-test. **a** denotes a significant difference  
894 between wildtype vs *athmgb15-4*, **b** denotes between wildtype vs RE and **c** between *athmgb15-*  
895 *4* vs RE. **B. (i-iii)** Restoration of in vitro pollen germination of *athmgb15-4* on treatment with  
896 exogenous methyl jasmonate (0.5mM and 2mM). **(iv)** quantification of the rate of pollen tube  
897 germination in presence of different concentrations of methyl jasmonate. Error bars represent  
898 mean  $\pm$  SD (n=3). Statistical significance was analysed by two-way ANOVA with Fisher's LSD  
899 ( $p \leq 0.05$ ). **a** denotes significance within the samples, **b** denotes significance between *athmgb15-*  
900 *4* vs *athmgb15-4* with 0.5mM MeJA and **c** denotes significance between *athmgb15-*  
901 *4* vs *athmgb15-4* with 2mM MeJA.

902

903 **Figure 6: AtHMGB15 acts as a transcriptional activator for the expression of MYC2.** **A.**  
904 ChIP analysis shows AtHMGB15 occupancy at the promoter/ upstream of *MYC2*,  
905 *MYB21* and *MYB24*. The data was normalised with no binding regions corresponding to  
906 At1g01840 and At1g01310. Error bars represent mean  $\pm$  SD (n=3). The significance of the result  
907 was analysed by paired two-tailed student's t-test ( $p \leq 0.05$ ). **a** denotes significance when  
908 normalized with At1g01840 and **b** denotes normalized with At1g01310. **B.** EMSA showing  
909 binding of recombinant AtHMGB15 to 32P labelled DNA fragments correspond to the upstream  
910 region of *MYC2*, *MYB21* and *MYB24*. **C.** 2kb promoter region of *MYC2* (pMYC2) was cloned  
911 with GUS reporter and Agrobacterium mediated infiltration was done with 35S::*AtHMGB15* and  
912 35S::*MYC2* in *Nicotiana tabacum*. GUS reporter gene assay was done after 48hrs using MUG.  
913 Error bars represent mean  $\pm$  SD (n=15). Statistical significance was analysed by paired two-  
914 tailed Student's t-test ( $p \leq 0.05$ ). **a** denotes significance between pMYC2 and pMYC2 with

915 different combination of proteins used in the experiment and **b** denotes significance between  
916 pMYC2+AtHMGB15(A4) and pMYC2+AtHMGB15 (A4) + MYC2 proteins. **D.** BiFC  
917 confirming the interaction between AtHMGB15 and MYC2 in onion epidermal cells using split  
918 YPF. AtHMGB15-cYFP +pSITE-nYFP-C1 and MYC2-nYFP +pSITE-cYFP-N1 was used as  
919 control. Scale bar=50 $\mu$ m.

920

921 **Figure 7: AtHMGB15 promotes transcription of MYBs.** **A. (i)** Expression of JA genes  
922 in *MYC2* knockout mutants *myc2-2* and *jin1-2* and compared with the expression in *athmgb15-*  
923 *4* using q-RTPCR. The fold change was represented with respect to wildtype. Error bars  
924 represent mean  $\pm$  SD (n=4). and the significance of the result was analysed by one-way ANOVA  
925 with Fisher's LSD ( $p \leq 0.005$ ). **(ii)** comparative JA and its derivatives content in flowers of  
926 wildtype and *MYC2* knockout mutants *myc2-2* and *jin1-2*. Error bars represent mean  $\pm$  SD  
927 (n=3). The significance of all these results was analysed by paired two-tailed Student's t-test. \*  
928 Denotes  $p \leq 0.05$ , \*\* $p \leq 0.005$  and \*\*\* $p \leq 0.0005$ . **B. (i & ii)** 2kb promoter regions of MYB21  
929 (pMYB21) and MYB24 (pMYB24) were cloned with GUS reporter and *Agrobacterium*  
930 mediated infiltration was done with 35S::AtHMGB15 and 35S::MYC2 in *Nicotiana*  
931 *tabacum*. GUS reporter gene assay was done after 48hrs using MUG. Error bars represent mean  
932  $\pm$  SD (n=15) and significance was analysed by paired two-tailed Student's t-test ( $p \leq 0.05$ ).  
933 **a** denotes significance between pMYB24/pMYB21 with different combination of proteins used  
934 in the experiment and **b** denotes significance between  
935 pMYB21+AtHMGB15(A4)/pMYB21+MYC2 and pMYB21+AtHMGB15 (A4) +MYC2  
936 proteins **C.** Comparison of stamen phenotype between wildtype, *athmgb15* and *athmgb15-4-*  
937 *OEA4* (RE). **D.** Proposed model elucidating the role of AtHMGB15 in activating the JA  
938 pathways by forming an activation complex with MYC2 to regulate stamen and pollen  
939 development.

940

941

942

943

944

945

946

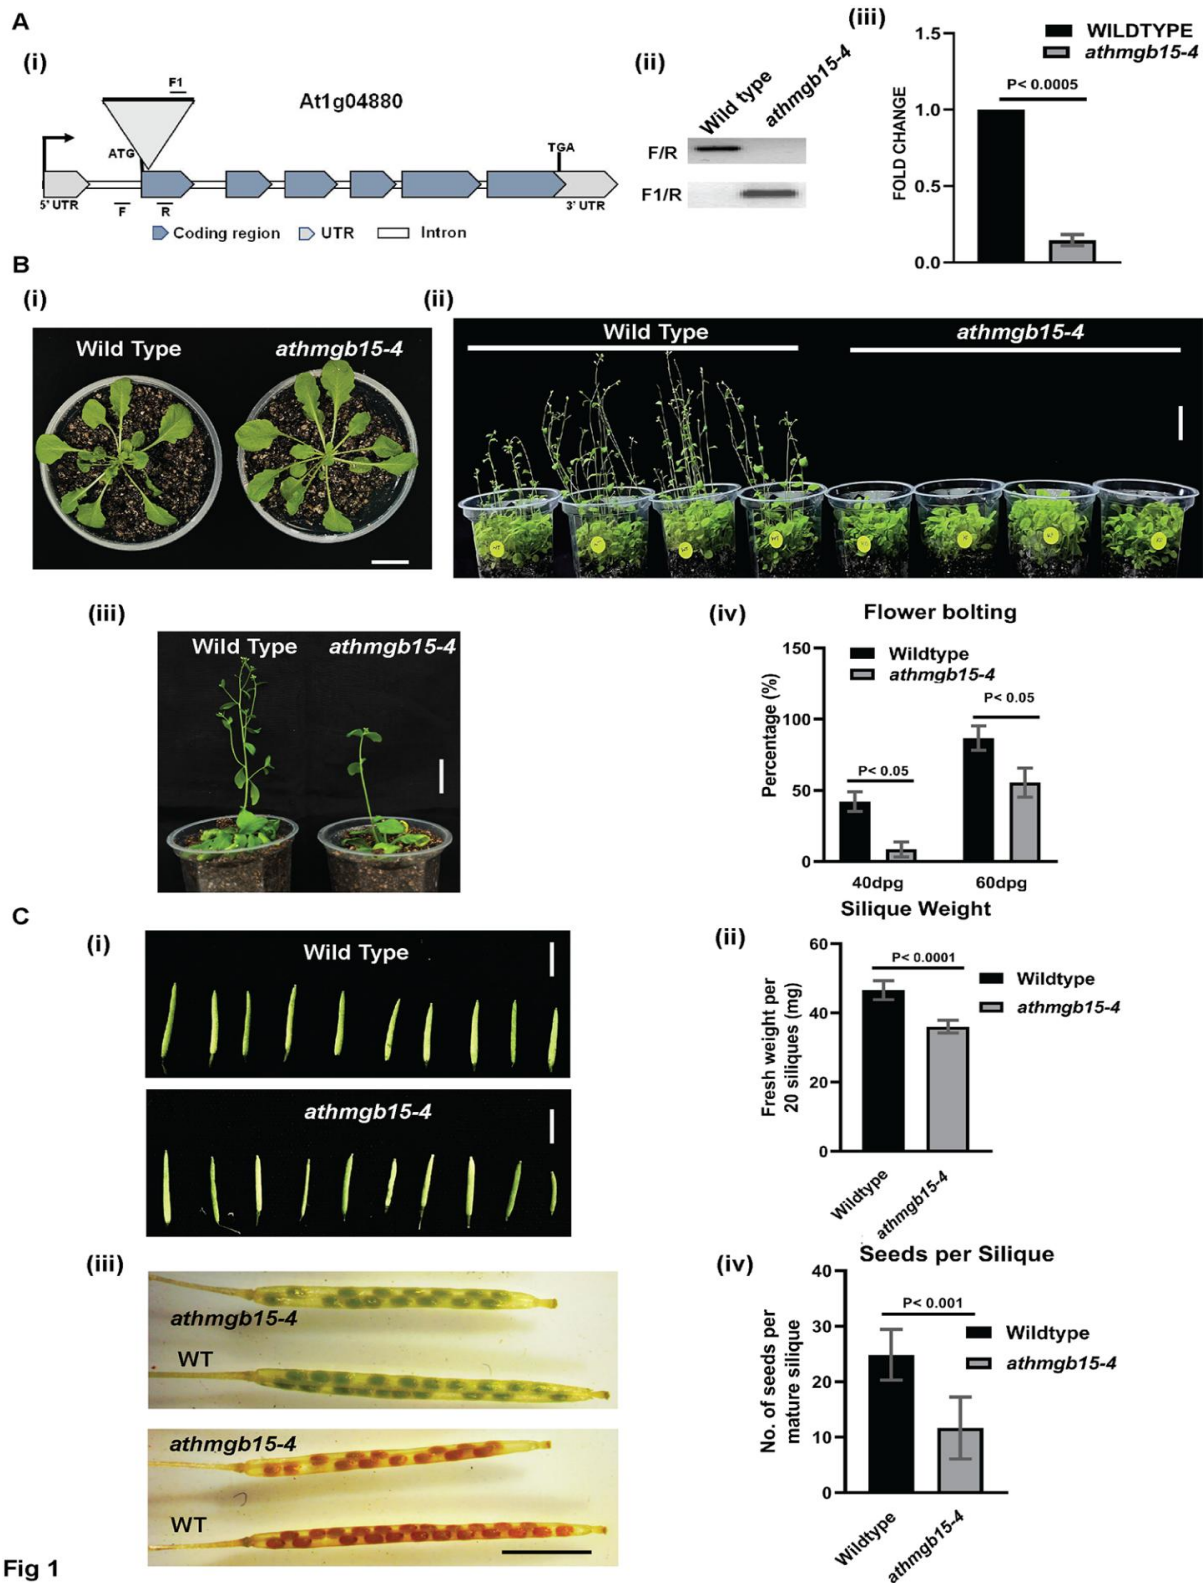

947 Fig 1

948 **Figure 1: Phenotypic characterization of *athmgb15-4* mutant**

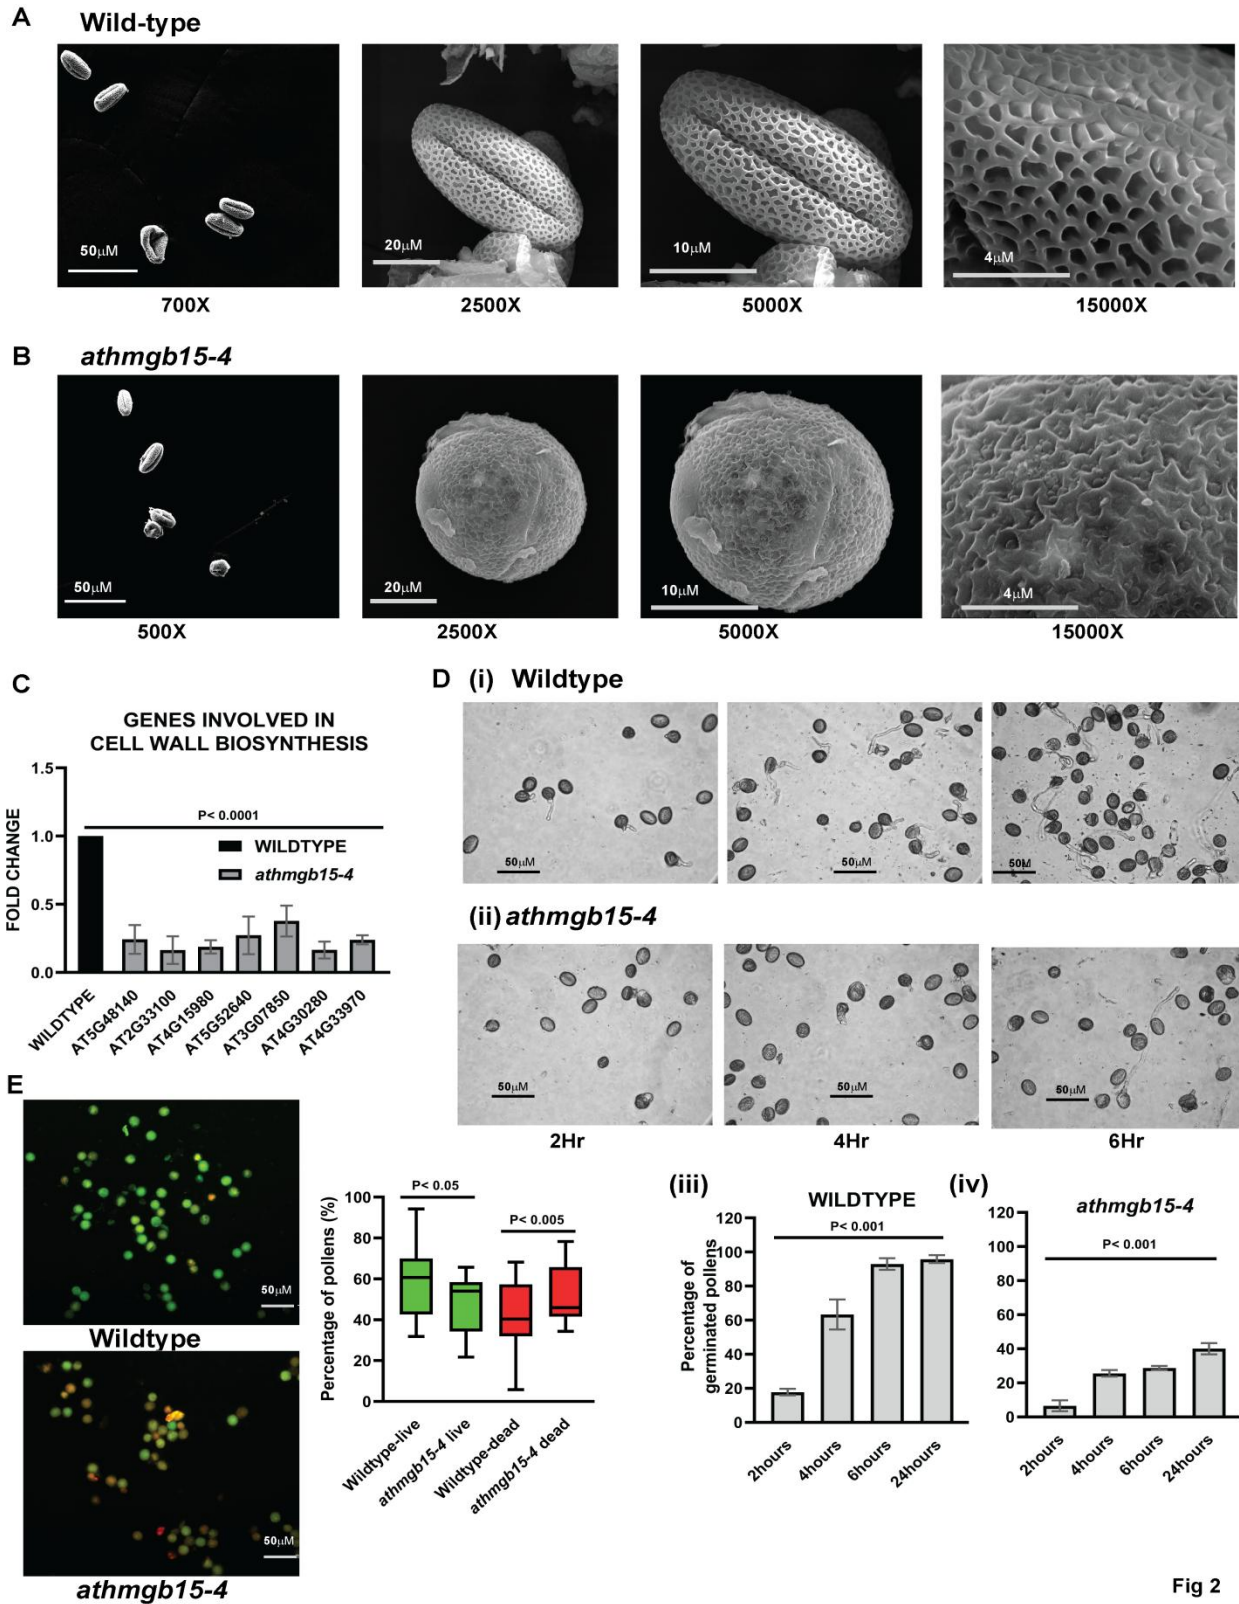

Fig 2

949

950 **Figure 2: *athmgb15-4* have impaired pollen morphology and pollen germination compared to wildtype.**

951



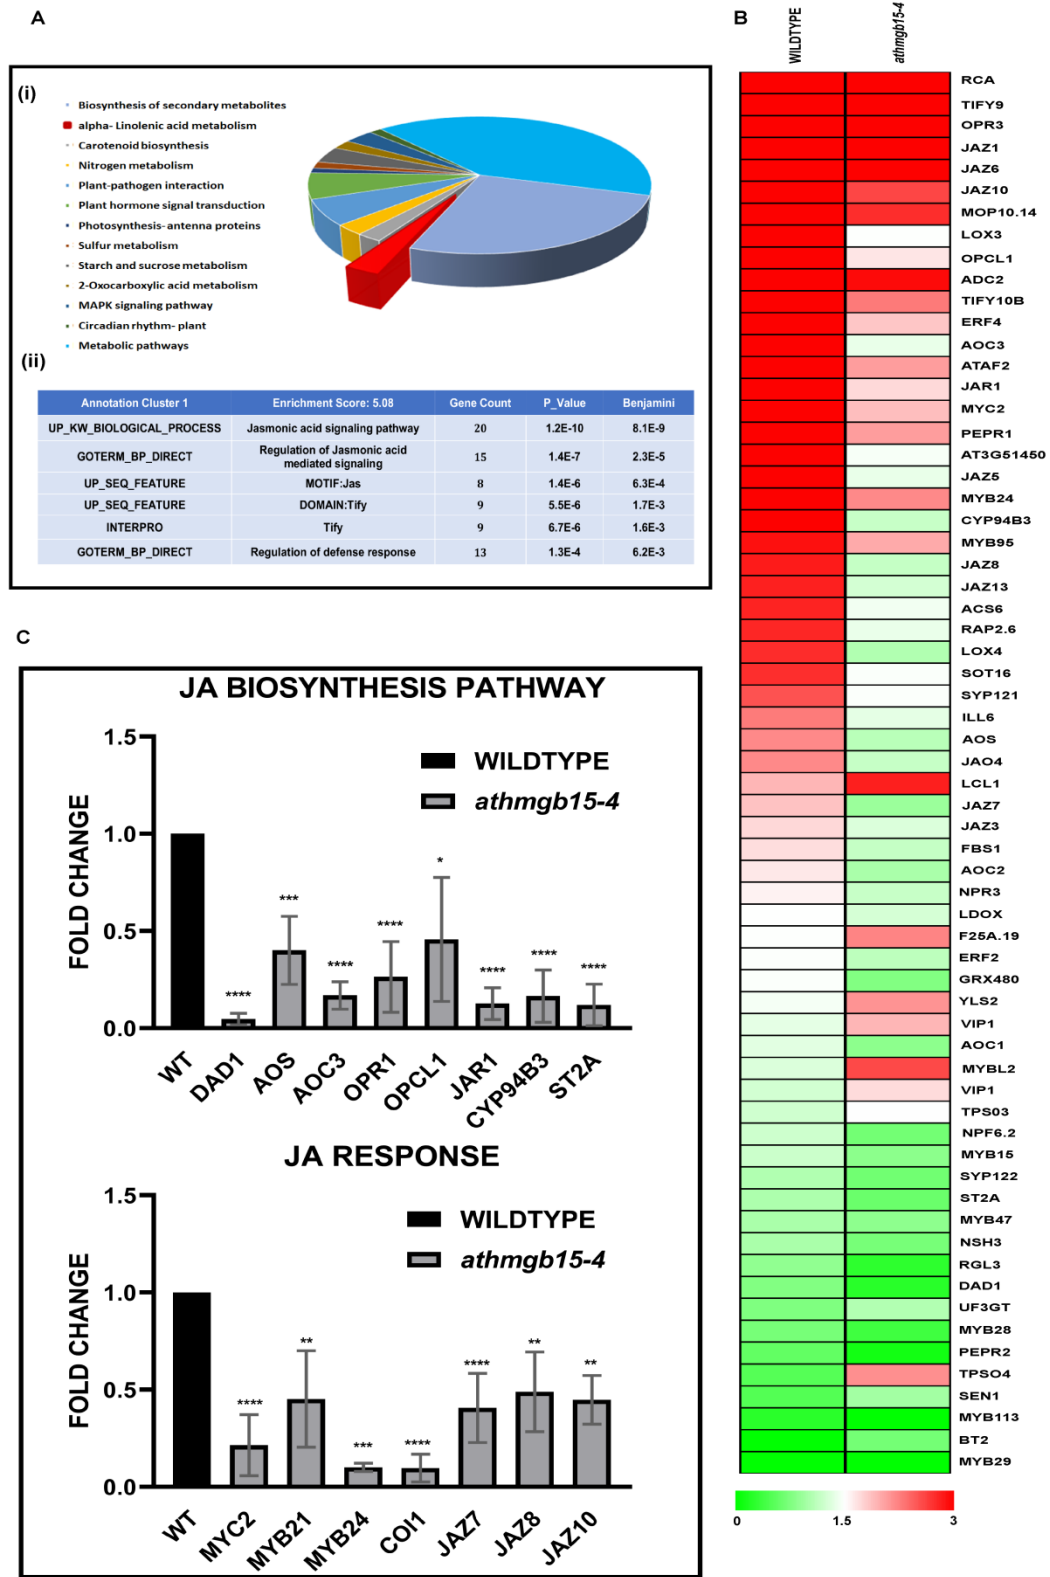

Fig 3

952

953

**Figure 3: AtHMGB15 deletion affects jasmonic acid pathway.**

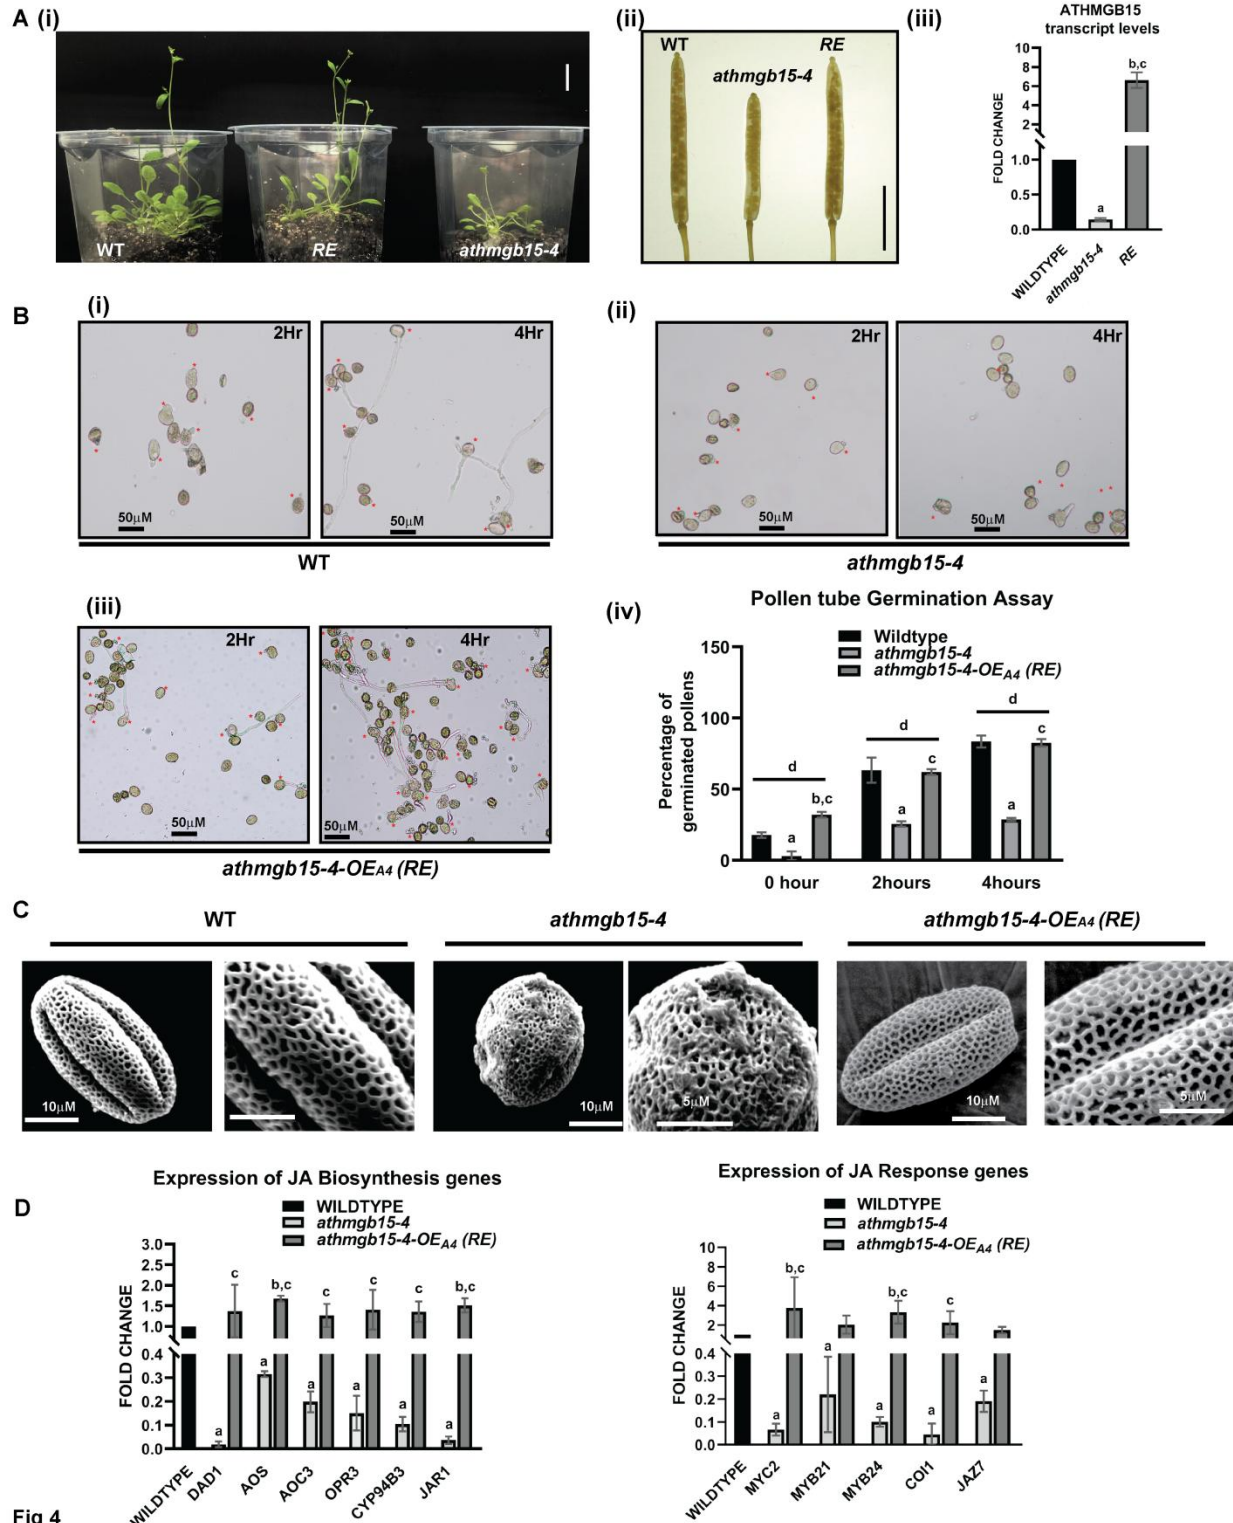

954

Fig 4

955 **Figure 4: Complementation of *athmgb15-4* mutant line with *AtHMGB15* restores pollen**  
 956 **morphology and pollen tube germination.**

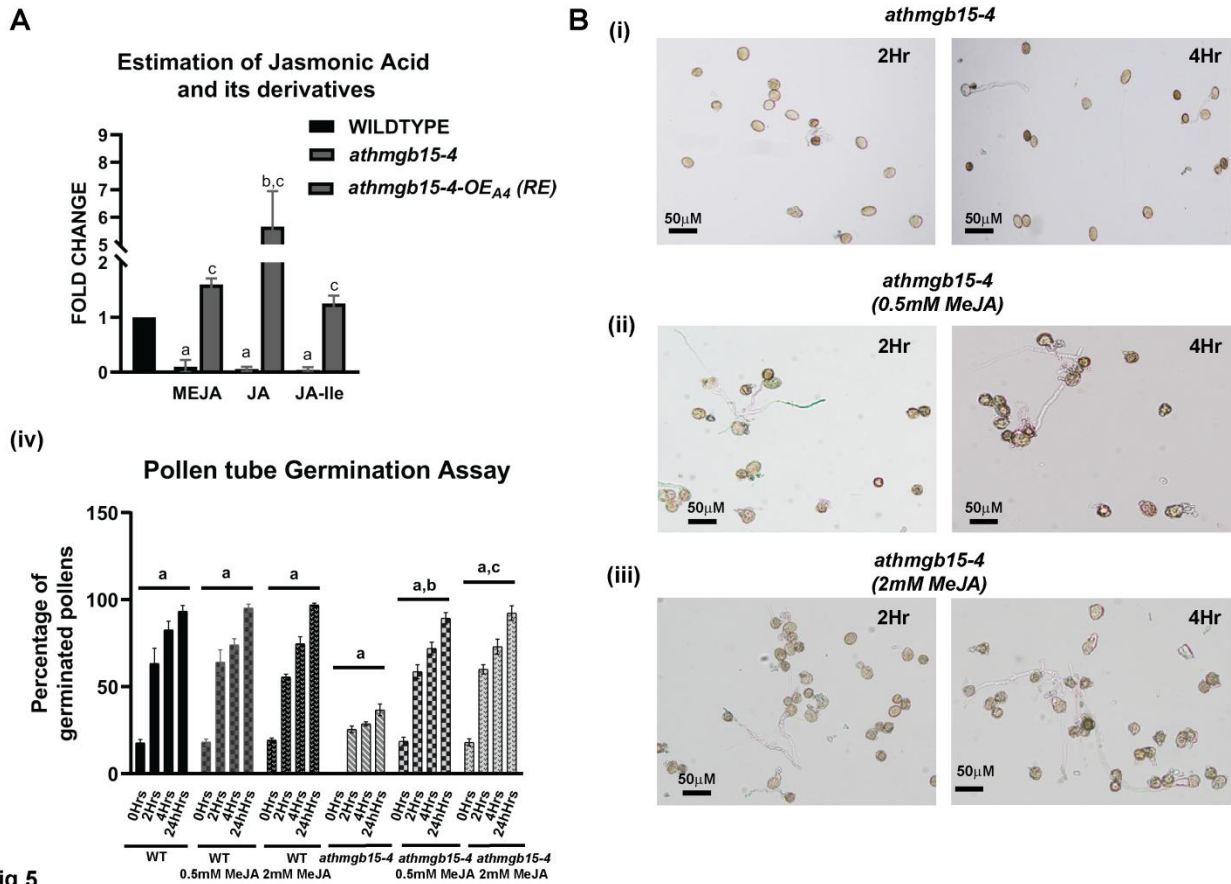

957 Fig 5

958 **Figure 5: *athmgb15-4* mutants have reduced levels of JA and its derivatives.**

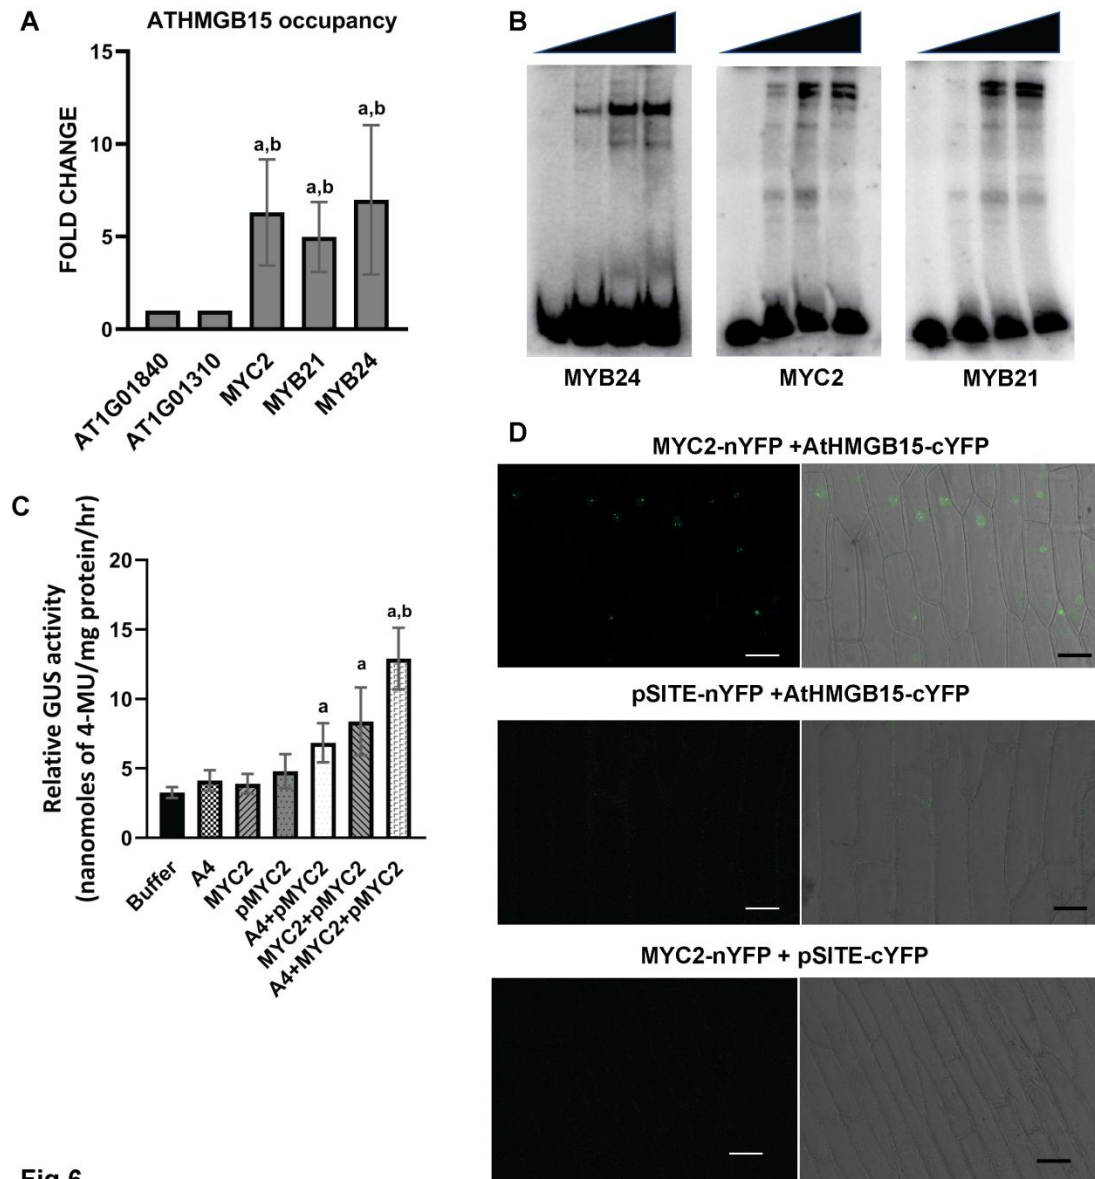

959  
960

**Fig 6**  
**Figure 6: AtHMGB15 acts as a transcriptional activator for the expression of *MYC2*.**

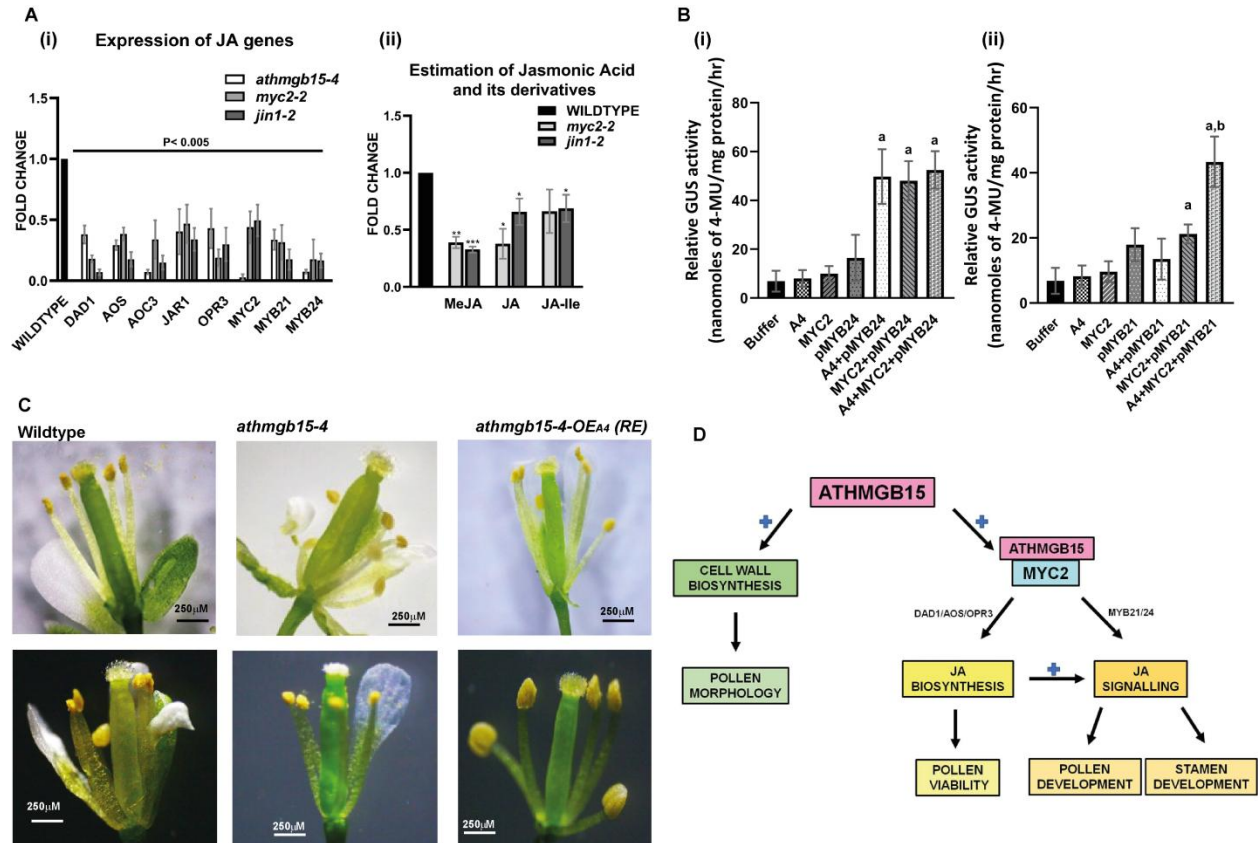

961 Fig 7  
 962 **Figure 7: AtHMGB15 promotes transcription of MYBs.**  
 963
